1 **YSL3-mediated copper distribution is required for fertility, grain yield, and size in**  
2 ***Brachypodium*.**

3  
4 Huajin Sheng<sup>1,3</sup>, Yulin Jiang<sup>1,3</sup>, Maryam Rahmati Ishka<sup>1</sup>, Ju-Chen Chia<sup>1</sup>, Tatyana  
5 Dokuchayeva<sup>4</sup>, Yana Kavulych<sup>1,5</sup>, Tetiana-Olena Zavodna<sup>1</sup>, Patrick N. Mendoza<sup>2</sup>, Rong  
6 Huang<sup>6</sup>, Louisa M. Smieshka<sup>6</sup>, Arthur R. Woll<sup>6</sup>, Olga I. Terek<sup>5</sup>, Nataliya D. Romanyuk<sup>5</sup>,  
7 Yonghong Zhou<sup>3\*</sup>, Olena K. Vatamaniuk<sup>1,2\*</sup>

8  
9 <sup>1</sup>Soil and Crop Sciences Section, School of Integrative Plant Science, Cornell University,  
10 Ithaca, NY 14853

11 <sup>2</sup>Plant Biology Section, School of Integrative Plant Science, Cornell University, Ithaca, NY  
12 14853

13 <sup>3</sup>Triticeae Research Institute, Sichuan Agricultural University, Wenjiang, Sichuan, China

14 <sup>4</sup>Cornell Nutrient Analysis Laboratory, School of Integrative Plant Science, Cornell  
15 University, Ithaca, NY 14853

16 <sup>5</sup>Ivan Franko National University of Lviv, Lviv, 79005, Ukraine

17 <sup>6</sup>Cornell High Energy Synchrotron Source (CHESS), Ithaca, NY 14853

18  
19 **\*Corresponding Authors:**

20 Olena K. Vatamaniuk  
21 Cornell University, School of Integrative Plant Science  
22 608 Bradfield Hall, Ithaca, NY 14853, USA  
23 Phone: 607-255-8049  
24 FAX: 607-255-8615  
25 Email: [okv2@cornell.edu](mailto:okv2@cornell.edu)

26  
27 Yonghong Zhou  
28 Sichuan Agricultural University, *Triticeae* Research Institute  
29 Wenjiang, Sichuan, China  
30 Phone: (+86)13882109233  
31 Email: [zhouyh@sicau.edu.cn](mailto:zhouyh@sicau.edu.cn)

32  
33 **Running Title:** BdYSL3 transports copper and regulates fertility

34

35 **Abstract**

36 Addressing the looming global food security crisis requires the development of high yielding  
37 crops. In this regard, the deficiency for the micronutrient copper in agricultural soils  
38 decreases grain yield and significantly impacts a globally important crop, wheat. In cereals,  
39 grain yield is determined by inflorescence architecture, flower fertility, grain size and weight.  
40 Whether copper is involved in these processes and how it is delivered to the reproductive  
41 organs is not well understood. We show that copper deficiency alters not only the grain set  
42 but also flower development in both wheat and its recognized model, *Brachypodium*  
43 *distachyon*. We then show that a brachypodium yellow-stripe-like 3 (YSL3) transporter  
44 localizes to the phloem and mediates copper delivery to flag leaves, anthers and pistils.  
45 Failure to deliver copper to these structures in the *ysl3* CRISPR/Cas9 mutant results in  
46 delayed flowering, altered inflorescence architecture, reduced floret fertility, grain number,  
47 size, and weight. These defects are rescued by copper supplementation and are complemented  
48 by the *YSL3* cDNA. This new knowledge will help to devise sustainable approaches for  
49 improving grain yield in regions where soil quality is a major obstacle for crop production.

## 50 **Introduction**

51 Global food security and the demand for high-yielding grain crops are among the most urgent  
52 drivers of modern plant sciences due to the current trend of population growth, extreme  
53 weather conditions and decreasing arable land resources [1]. The grain yield is directly linked  
54 to the crop and soil fertility. In this regard, it has been known for decades that the deficiency  
55 for the micronutrient copper in alkaline, coarse-textured or organic soils that occupy more  
56 than 30% of the world arable land, compromises crop fertility, reduces grain/seed yield and in  
57 acute cases results in crop failure [2-5]. In accord with the essential role of copper in  
58 reproduction, recent studies using synchrotron x-ray fluorescent (SXRF) microscopy  
59 established that copper localizes to anthers and pistils of flowers in a model dicotyledonous  
60 species, *Arabidopsis thaliana*, and failure to deliver copper to these reproductive organs  
61 severely compromises fertility and seed set [6]. Although copper deficiency can be remedied  
62 by the application of copper-based fertilizers, this approach is not environmentally friendly  
63 and can lead to the build-up of toxic copper levels in soils [2, 5, 7]. Mineral nutrient  
64 transporters have been recognized as key targets for improving the mineral use efficiency in  
65 sustainable crop production [8]. Wheat is the world's third important staple crop after maize  
66 (*Zea mays*) and rice (*Oryza sativa*); however, wheat grain yield remained relatively low under  
67 marginal growing environments despite significant breeding efforts [9]. Wheat is also  
68 regarded as the most sensitive to copper deficiency [2, 3, 5]. How copper uptake and internal  
69 transport is achieved in wheat and how it affects fertility, is poorly understood. Based on  
70 studies in *A. thaliana*, copper uptake and internal distribution is mediated by CTR/COPT  
71 transporters, P-type ATPases and members from the Yellow Stripe-Like (YSL) subfamily of

72 the oligopeptide (OPT) transporter family [7, 10-17]. The majority of these transporters are  
73 transcriptionally upregulated by copper deficiency by a conserved transcription factor, SPL7  
74 (Squamosa Promoter Binding Protein-like7), and a newly identified transcription factor  
75 CITF1 (Copper-Deficiency Induced Transcription Factor1) [6, 18, 19]. The expression of  
76 several COPT family members is also induced in roots by the copper deficiency in *Oryza*  
77 *sativa* and an emerging wheat model *Brachypodium distachyon* (from here on brachypodium),  
78 and several brachypodium COPTs mediate low-affinity copper uptake [20, 21]. A member of  
79 the YSL transporters, OsYSL16 functions in the phloem-based copper delivery to  
80 reproductive organs in rice [22-24]. Other studies, however, reported that OsYSL16 functions  
81 mainly in the distribution of iron [25, 26]. Recognizing the limitations of wheat for functional  
82 genetics studies due to polyploidy, lower transformation rates and longer life cycle, we used  
83 brachypodium as a wheat proxy [27-30] for the study of copper transport processes and their  
84 role in establishing yield traits. We show that copper deficiency alters not only the grain set  
85 but also flower development in both wheat and brachypodium. We reveal that brachypodium  
86 yellow-stripe-like 3 (YSL3) transporter mediates phloem-based copper distribution from  
87 mature leaves to flag leaves, anthers and pistils of florets. Loss of this function in the *ysl3*  
88 mutant results in a delayed flowering, altered inflorescence architecture, reduced floret  
89 fertility, grain number, size, and weight. These defects are rescued by copper supplementation  
90 and are complemented by the *YSL3* cDNA. Our results suggest that the manipulation of YSL3  
91 and other-like proteins has the potential to play a role in devising sustainable and  
92 environmentally friendly approaches for improving wheat and other cereal grain yields and  
93 thus, food security.

## 94 **RESULTS**

### 95 **Copper Deficiency Significantly Decreases Flower Formation and Seed Yield in Wheat** 96 **and Brachypodium.**

97 We first evaluated the growth and fertility of wheat and brachypodium grown under different  
98 concentrations of copper to validate using brachypodium as a wheat model in this study.  
99 Omitting copper from the hydroponic medium severely stunted the growth, tiller, head,  
100 flower and seed/grain formation per plant in both wheat and brachypodium (**Fig. 1** and  
101 **Supplemental Fig. 1**). Low copper (10 nM) while reduced the number of tillers and heads  
102 per plant of both plant species (**Supplemental Fig. 1C, D, E, F**), exerted the most  
103 pronounced effect on flower and seed formation (**Fig. 1E to H**). Notably, seed formation was  
104 reduced by 87% in both wheat and brachypodium when plants were grown under 50 nM  
105 copper, although flower formation was only somewhat reduced compared to plants grown  
106 under copper replete conditions (125, 250 nM copper, **Fig. 1E to H**). These data show that  
107 copper deficiency impacts different aspects of reproductive development including flower  
108 and seed/grain formation, with the most dramatic effect on seeds/grain production.  
109 Furthermore, these data supported the applicability of using brachypodium for the study of  
110 the relationship between copper and fertility in cereals as well as the identification of  
111 transport pathways responsible for the delivery of copper to plant reproductive organs.

112

### 113 **Copper Deficiency Increases the Transcript Abundance of *YSL3***

114 We then focused on brachypodium *YSL3* because its counterparts in *Arabidopsis* and rice  
115 contribute to transition metals, including copper transport [15, 22, 23, 28]. We found that

116 *YSL3* was expressed in different plant organs including roots, leaves, nodes and reproductive  
117 organs (**Fig. 2A**). The highest expression of *YSL3* was observed in young leaves of  
118 four-week-old seedlings, followed by flag leaves at the flowering stage and mature leaves at  
119 jointing (**Fig. 2A**). *YSL3* was also expressed in different flower organs including lemma,  
120 palea and ovaries, but the abundance of the transcript was much lower than in leaves (**Fig.**  
121 **2A**).

122 We then found that *YSL3* was highly upregulated under copper deficiency in roots, stems  
123 and mature leaves but not in young leaves of four-week-old plants. Copper deficiency also  
124 significantly increased the transcript abundance of *YSL3* in flag leaves and flowers at the  
125 reproductive stage (**Fig. 2B**). These results suggested that *YSL3* might be involved in internal  
126 copper distribution and delivery to reproductive organs.

127

### 128 ***YSL3* is Expressed Mainly in the Phloem and Localizes to the Plasma Membrane**

129 We next examined the tissue and cell-type specificity of *YSL3* expression using  
130 *Brachypodium* transformed with the *YSL3<sub>pro</sub>-GUS* construct. We found that *YSL3* is  
131 expressed predominantly in the vascular tissues of roots and leaves of plants subjected to  
132 copper deficiency (**Fig. 3A, B**). The bulk of GUS staining was associated with the phloem of  
133 large and small longitudinal veins as well as in mesophyll parenchyma cells (**Fig. 3C**).  
134 Because nodes of grasses are regarded as hubs directing metal distribution [31], we also  
135 evaluated *YSL3<sub>pro</sub>-GUS* activity in the node I. GUS activity was observed mainly in large  
136 vascular bundles of the node (**Fig. 3D**). Within the large vascular bundles, xylem is located  
137 on the inside and the phloem is on the outside and GUS staining was mainly associated with

138 the phloem and also was found in parenchyma cells (**Fig. 3E**). Concerning florets, GUS  
139 activity was observed in the ovary, styles (**Fig. 3F**), the vasculature of the lemma (**Fig. 3G**),  
140 but not in anthers and palea. GUS activity was undetectable in any of the tissues of plants  
141 grown under copper sufficient conditions. The predominant expression of *YSL3* in the phloem,  
142 phloem parenchyma cells and mesophyll suggested that it is involved in internal copper  
143 distribution rather than copper uptake into the roots. We next found that *YSL3* localizes to the  
144 plasma membrane (**Supplemental Figure 2**), suggesting that it is involved in movement of  
145 substrates into or out of the cell rather than subcellular (*e.g.* vacuolar) sequestration.

146

#### 147 **The *ysl3-3* Mutant of *Brachypodium* is Sensitive to Copper Deficiency**

148 We then generated *ysl3* deletion mutants using the CRISPR/CAS9 (clustered regularly  
149 interspaced short palindromic repeats) approach (**Supplemental Information** and  
150 **Supplemental Figures 3A** and **4**). After obtaining Cas9-free mutant lines (**Supplemental**  
151 **Figure 3B, C**), positions of deletion breakpoints were established by sequencing. Three  
152 alleles bearing 122, 123 and 182 bp deletions encompassing a part of the 5' UTR and the  
153 first exon of *YSL3* were identified and designated as *ysl3-1*, *ysl3-2* and *ysl3-3*, respectively  
154 (**Supplemental Information online** and **Supplemental Figures 3A, E**). Plants of all alleles  
155 were smaller than wild-type when were grown under copper sufficient conditions  
156 (**Supplemental Figure 3D**). Given the essential role of copper in plant growth and  
157 development, we hypothesized that the smaller size of mutants could be due to a defect in the  
158 copper transport.

159 We then used the *ysl3-3* allele, for the in-depth studies and have also generated two

160 *ysl3-3* transgenic lines expressing *YSL3* cDNA, *ysl3/YSL3-1* and *ysl3/YSL3-2*, for functional  
161 complementation assays. The level of *YSL3* transcript was increased in both *ysl3/YSL3-1* and  
162 *ysl3/YSL3-2* lines compared to the wild-type (**Supplemental Figure 5**). We next compared  
163 the growth of the *ysl3-3* mutant *vs.* wild-type and *ysl3/YSL3-1* and *ysl3/YSL3-2* plants in the  
164 medium with *vs.* without copper. As evident by the smaller stature of the *ysl3-3* plants  
165 (**Supplemental Figure 6A**), curling of their leaf margins (**Supplemental Figure 6B**) and  
166 decreased height and dry weight of shoots (**Supplemental Figure 6C, D**), the *ysl3-3* mutant  
167 was more sensitive to copper deficiency than the wild-type. The dry weight of roots of the  
168 *ysl3* mutant was significantly different from wild-type even when plants were grown under  
169 copper sufficiency and omitting copper from the medium did not change it further  
170 (**Supplemental Figure 6E**). Importantly, the expression of *YSL3* cDNA in the *ysl3-3* mutant  
171 rescued all defects of the mutant (**Supplemental Figure 6A to E**) suggesting that slower  
172 growth of the *ysl3-3* plants under control conditions and further reduced growth under copper  
173 deficiency were due to the loss of *YSL3* gene. The *ysl3-3* mutant was not more sensitive than  
174 wild-type to manganese, iron or zinc deficiencies (**Supplemental Figure 7**). Together, these  
175 results indicate that *BdYSL3* is essential for the normal growth of *Brachypodium* under  
176 control condition and under copper deficiency.

177

### 178 **The *ysl3* Mutant has a Delayed Flowering Time and Produces more Spikelets and** 179 **Florets per Inflorescence**

180 We then grew wild-type, the *ysl3-3* mutant and *ysl3/YSL3-1* and *ysl3/YSL3-2* plants in soil to  
181 evaluate the role of *YSL3* in development and reproduction. We found that the flowering time



182 of the *ysl3-3* mutant was significantly delayed compared to wild-type plants (**Fig. 4A, B**).

183 While wild-type plants have started flowering by the 40<sup>th</sup> day of growth, the *ysl3-3* mutant

184 flowered on average 2 weeks later (**Fig. 4A, B**). The *ysl3-3* mutant also had shorter flag

185 leaves (**Fig.4C** and **Table 1**) and inflorescences (*alias* spikes) compared to wild-type (**Fig.**

186 **4C**). We then compared the flower development of the *ysl3-3* mutant vs. wild-type. Florets in

187 grasses are formed on a structure called spikelet. In *Brachypodium*, a terminal spikelet and a

188 limited number of lateral spikelets give rise to a variable number of florets per spikelet [29].

189 We found that while wild-type plants produced 2 to 4 lateral spikelets in addition to a

190 terminal spikelet, the *ysl3-3* mutant developed 5 to 7 lateral spikelets in addition to a terminal

191 spikelet (**Fig. 4C** and **Table 1**). The increased number of spikelets in the *ysl3-3* mutant

192 resulted in a 1.8-fold increase in the floret number compared to wild-type plants (**Table 1**).

193 Fertilizing the *ysl3-3* mutant with 25  $\mu$ M CuSO<sub>4</sub> functionally complemented the mutant

194 suggesting that the decreased flag leaf length, altered spikelet and floret formation in the

195 mutant was due to a defect in copper transport (**Table 1**). Furthermore, the expression of

196 *YSL3* cDNA in the *ysl3-3* mutant also functionally complemented the mutant (**Fig. 4A to C**

197 and **Table 1**) suggesting that the decreased flag leaf length, altered spikelet and floret

198 formation in the mutant was due to the loss of *YSL3*.

199

### 200 **The *ysl3* Mutant has a Defect in Pollen and Floret Fertility**

201 Because the *ysl3-3* mutant developed more florets per plant and spike (**Fig. 4C** and **Table 1**)

202 than wild-type, we anticipated that the mutant would also form more seeds. Surprisingly,

203 there was no difference in grain production per spike between different plant lines (**Table 1**).

204 Furthermore, we found a significant (1.8-fold) reduction in floret fertility as evident by a  
205 reduced number of grains formed per the number of florets per spike in the mutant *vs.*  
206 wild-type (**Table 1**). Importantly, the expression of *YSL3* in the *ysl3-3* mutant or copper  
207 supplementation rescued this defect (**Table 1**). We concluded that YSL3-mediated copper  
208 delivery to flowers is important for flower fertility. We then examined whether the reduced  
209 fertility of the *ysl3-3* mutant is associated with the defect in androecium, gynoecium or both.  
210 We found that pollen viability of *ysl3-3* pollen was nearly half-of observed in the wild-type  
211 and fewer *ysl3* mutant pollen grains were able to germinate and produce pollen tubes (**Fig.**  
212 **4D, C**). We also found that more than 40% of the flowers from *ysl3-3* mutants had altered  
213 stigma morphology compared to the wild-type. Specifically, the stigma of the *ysl3-3* mutant  
214 appeared dehydrated, shorter and less feathery compared to the wild-type (**Fig. 4F**). Together,  
215 these data suggest that the compromised fertility of the *ysl3-3* mutant might be due to defects  
216 in both androecium and gynoecium.

217

## 218 **YSL3 Regulates Copper Delivery from Mature Leaves to Flag Leaves and Flowers**

219 To examine whether the delayed transition to flowering and reduced fertility of the *ysl3*  
220 mutant were caused by the disruption of copper transport, we analyzed copper concentration  
221 and spatial distribution in different plant tissues using inductively coupled plasma mass  
222 spectrometry (ICP-MS) and 2D synchrotron-x-ray fluorescence (2D-SXRF) microscopy,  
223 respectively. We did not find a significant difference in copper concentration in roots of the  
224 *ysl3-3* mutant compared to wild-type or *ysl3/YSL3-1* plants (**Fig. 5A**). However, the *ysl3-3*  
225 mutant accumulated 54% more copper in mature leaves compared to wild-type (**Fig. 5B**). The

226 expression of *YSL3* cDNA in the *ysl3-3* mutant reduced copper accumulation in mature leaves  
227 to the wild-type level suggesting that the observed defects in the *ysl3-3* mutant were due to  
228 the loss of YSL3 function (**Fig. 5B**). In contrast to mature leaves, flag leaves and flowers of  
229 the *ysl3-3* mutant accumulated 2.9- and 2.6-fold less copper, respectively than corresponding  
230 organs of wild-type (**Fig. 5C**). The expression of *YSL3* in the *ysl3* mutant rescued its copper  
231 accumulation defect. Together, these results suggested that YSL3 directs copper distribution  
232 from mature leaves to flag leaves and flowers.

233 Analysis of mature leaves using 2D-SXRF disclosed that copper was associated mainly  
234 with leaf veins in both wild-type and the *ysl3-3* mutant. We also found that copper  
235 accumulation was much higher in veins of the *ysl3-3* mutant compared to wild-type (**Fig. 6A**).  
236 Similar to mature leaves, the bulk of copper was associated with major and minor veins of  
237 flag leaves in wild-type and the *ysl3-3* mutant (**Fig. 6B**). However, both vein types in flag  
238 leaves of the *ysl3-3* mutant accumulated much less copper compared to wild-type and the  
239 mutant expressing *YSL3* cDNA (**Fig. 6B**). The bulk of copper was associated with anthers and  
240 ovary of florets in wild-type while copper was barely detectible in anthers and was  
241 significantly lower in the ovary of the *ysl3-3* mutant compared to wild-type and the *ysl3-3*  
242 mutant expressing *YSL3* cDNA (**Fig. 6C**).

243 We next thought to determine the spatial distribution of copper in nodes because nodes of  
244 grasses act as hubs directing and connecting mineral transport pathways for their subsequent  
245 distribution to various organs [31]. To do so, we utilized 2D-SXRF in a confocal mode  
246 (2D-CXRF) using a specialized x-ray collection optic to obtain micron-scale resolution [32,  
247 33]. For the current study, this technique is preferable to traditional SXRF methods (both 2D

248 SXRF and 3D micro-XRF tomography) because it allows comparison of quantitative metal  
249 distributions among different samples without the need to control or limit sample thickness or  
250 lateral size [33]. We found that the bulk of copper was associated with large vascular bundles  
251 with a higher concentration in the phloem region in nodes of the wild-type (**Fig. 6D, E**). In  
252 contrast, copper accumulation in vascular bundles was barely detectible in the *ysl3-3* mutant  
253 and was mostly associated with the xylem (**Fig. 6D, E**).

254 Taken together, these data suggested that *YSL3* plays an important role in copper delivery  
255 from mature to flag leaves and then after to reproductive organs and acts by loading copper to  
256 the phloem. This *YSL3* function is important for the normal development of flowers and  
257 fertility.

258

### 259 **Grains of the *ysl3-3* Mutant Accumulate less Copper, are Smaller and Lighter**

260 We next tested whether the loss of the *YSL3* function also impacts copper accumulation in  
261 grains. We found that the concentration of copper in grains of the *ysl3-3* mutant was lower by  
262 44.52 % compared to wild-type and the *YSL3-1* complementary line, all grown in soil (**Fig.**  
263 **7A**). This shows that the *ysl3-3* mutant defect in remobilizing copper from mature leaves to  
264 flag leaves reduces not only copper accumulation in reproductive organs (**Figs. 6B, C**) but  
265 also loading to grains.

266 While dehusking grains of different plant lines for ICP-MS analysis, we noticed that the  
267 *ysl3-3* mutant produced shorter and thinner grains than wild-type plants and both  
268 complementary lines. This observation was then confirmed by analysis of the straight grain  
269 length and width (**Fig. 7B to D**). Consistent with a shorter and thinner size, the 1000-grain

270 weight of the *ysl3* mutant was reduced by 30% compared to wild-type (**Fig. 7E**). The  
271 expression of *YSL3* cDNA in the *ysl3-3* mutant or copper supplementation rescued the grain  
272 size and 1000-grain weight of the *ysl3-3* mutant. These results show that YSL3 function and  
273 copper are important for the expression of important agronomic traits including grain size and  
274 weight.

275

## 276 **Discussion**

277 Providing a sufficient amount of high quality, nutrient-dense and toxin-free food using  
278 sustainable and environmentally friendly approaches are among the grand challenges of the  
279 21<sup>st</sup> century, driven by the population growth, increasing instances of extreme weather  
280 conditions and decreasing arable land resources that limit crop yields [1, 34, 35]. Considering  
281 that a micronutrient copper is among yield-limiting factors of a globally important crop,  
282 wheat, here we sought to determine how copper is delivered to reproductive organs in a  
283 wheat model, brachypodium. We found that severe copper deficiency (0 or 10 nM copper)  
284 most significantly affected the development of flowers resulting in poor grain set (**Fig. 1** and  
285 **Supplemental Figure 1**). Notably, while flowers were formed in both wheat and  
286 brachypodium under low copper conditions (50 nM CuSO<sub>4</sub>), grain yield was severely  
287 affected (**Fig. 1E to H**). This “silent” effect of low copper availability on grain set could  
288 occur in crops cultivated in agricultural soils with limited copper availability underscoring the  
289 need for improving crops copper use efficiency for sustainable and environment-friendly crop  
290 production. We then show that the function of YSL3 transporter in brachypodium is essential  
291 for the transition to flowering, pollen fertility, grain yield, and quality via YSL3 function in

292 the phloem-based copper re-distribution from mature to flag leaves and reproductive organs.  
293 This conclusion was based on the following findings. *YSL3* was expressed primarily in leaves  
294 under copper sufficient conditions and was highly upregulated by a copper deficiency in all  
295 tissues including roots, mature leaves, flag leaves and flowers but not in young leaves,  
296 possibly because the transcript level of *YSL3* in young leaves was already high (**Fig. 2**). *YSL3*  
297 resided in the plasma membrane (**Supplemental Figure 2**) and the bulk of its expression was  
298 associated with the phloem in leaves and node 1 although it was also present in mesophyll  
299 and phloem parenchyma cells (**Fig. 3**). Phloem is a vascular tissue that is responsible for the  
300 translocation of nutrients including mineral element copper from source tissues such as  
301 mature leaves to sink tissues including developing flag leaves, flowers and seeds/grain [36].  
302 Consistent with the role of *YSL3* in the phloem-based copper transport from sources to sinks,  
303 copper accumulation was significantly higher in mature leaves and significantly lower in flag  
304 leaves, flowers, and grains of the *ysl3-3* mutant than of the wild-type (**Fig. 5B, C and 7A**).  
305 Because copper accumulation was significantly reduced in the phloem region in the node 1 of  
306 the *ysl3-3* mutant vs. wild-type (**Figure 6A, D**), we concluded that *YSL3* mediates copper  
307 loading into the phloem for subsequent distribution from source to sink tissues.

308 Consistent with our past studies of copper distribution in the reproductive organs of *A.*  
309 *thaliana* [6], the bulk of copper in florets of brachypodium was associated with anthers of  
310 stamens and ovaries of pistils (**Fig. 6C**). The inability of the *ysl3-3* mutant to deliver copper  
311 to these reproductive organs severely reduced pollen viability, germination (**Fig. 4D, E**) and  
312 significantly decreased floret fertility (**Table 1**). Importantly copper supplementation or the  
313 expression of *YSL3* cDNA rescued fertility defects of the *ysl3* mutant (**Table 1**). It is possible

314 that the essential nature of BdYSL3-mediated copper delivery to anthers and pistils and the  
315 role of copper in pollen fertility stems from its role in maintaining metabolic functions of  
316 copper-requiring metalloenzymes, and/or for providing respiration-based energy supply for  
317 the energy-dependent reproduction processes *via* sustaining the function of the copper  
318 requiring mitochondrial cytochrome *c* oxidase complex [7, 37]. In this regard, *A. thaliana*  
319 COX11 homolog is involved in the insertion of copper into the cytochrome *c* oxidase (COX)  
320 complex during its assembly in mitochondria, is expressed in germinating pollen among other  
321 tissues and its loss of function impairs pollen germination [38]. It is noteworthy that adequate  
322 copper nutrition has been also linked to successful male fertility in mammals, including  
323 humans [39]. We also noted that copper accumulated in the stigma of pistils of wild-type  
324 plants but not of the *ysl3* mutant (**Fig. 6C**) and that the stigma of the *ysl3* mutant is less  
325 feathery compared to the wild-type (**Fig. 4F**). As the receptive portion of the gynoecium,  
326 stigma plays an important role in capturing pollen, supporting pollen germination and pollen  
327 tube guidance into the style and ovaries [40]. Finding that copper is localized to the stigma in  
328 *Brachypodium* and that loss of copper in the stigma of the *ysl3* mutant is associated with  
329 decreased fertility links stigma development and function to copper homeostasis. The role of  
330 copper in the gynoecium function is yet to be discovered.

331 A significant delay in transitioning to reproduction and altered inflorescence architecture  
332 as evident by nearly doubled lateral spikelet formation compared to wild-type plants (**Fig. 4**  
333 **B, C** and **Table 1**) are intriguing aspects of the *ysl3* mutant phenotype. The transition from  
334 the vegetative to the reproductive stage and spikelet formation depend on the inflorescence  
335 meristem identity and determinacy, the developmental fate of axillary inflorescence meristem,

336 which in turn depends on a variety of environmental and endogenous cues [41-44]. For  
337 example, shoot apical meristem activity in *A. thaliana* and organogenesis adapt rapidly to  
338 changes in nitrate availability in soils through the long-range cytokinin signaling [43].  
339 Inflorescence branching and auxiliary inflorescence meristems fates in maize are regulated by  
340 sugar metabolism *via* the function of three *RAMOSA* genes [45-48]. Hormones including  
341 auxin and cytokinin have been also known to function in inflorescence architecture with  
342 auxin having a critical and conserved role in axillary meristem initiation in *A. thaliana* and  
343 maize [44, 49]. In addition to hormones, small non-coding RNA, microRNAs are implicated  
344 in developmental transitions and the regulation of inflorescence branching [49, 50]. Notably,  
345 the production of auxin and jasmonic acid is influenced by copper availability and copper  
346 deficiency stimulates the production of several miRNA families [6, 51, 52]. Considering the  
347 prominent role of copper in photosynthesis and the effect of copper homeostasis on hormone  
348 or miRNAs production, it is tempting to speculate that the defect in the internal copper  
349 distribution and delivery to flag leaves and florets in the *ysl3* mutant alters sugar metabolism,  
350 and/or miRNA and/or auxin or other hormones production resulting in delayed transition to  
351 flowering and altered inflorescence architecture. Because the timing of terminal spikelet  
352 differentiation determines the production of lateral spikelets [53, 54], it is also possible that  
353 the delayed transition to flowering observed in the *ysl3* mutant (**Fig. 4A, B**) results in  
354 increased lateral spikelets production. Although the mutation of the YSL3 orthologue in rice,  
355 OsYSL16, decreases fertility, it does not alter inflorescence architecture [23]. The distinct  
356 role of orthologous transporters may be related to distinct inflorescence architecture in rice  
357 and *Brachypodium*. The rice inflorescence, a panicle, is highly branched and is produced



358 from multiple types of axillary meristems [44, 55]. The spikelet meristem gives rise to a  
359 single floral meristem and a single floret. By contrast, inflorescence in brachypodium is  
360 similar to its close relative wheat and is an unbranched spike where axillary meristems  
361 produced by the inflorescence meristem, develop directly into spikelets [53, 54]. Future  
362 studies will determine the specific role of YSL3 and copper in determining the inflorescence  
363 architecture of *Brachypodium*.

364 In addition to decreased fertility, the *ysl3-3* mutant accumulates less copper in grains and  
365 its grains are shorter, thinner and lighter than grains of wild-type, or the *ysl3* mutant  
366 expressing *YSL3* cDNA, or the mutant grown with copper supplementation (**Fig. 7**). Both  
367 grain size and weight are regulated by a complex network that integrates multiple  
368 developmental and environmental signals throughout the reproductive stage, and these  
369 processes are affected by sink and source characteristics including the size and photosynthetic  
370 capacity of source tissues and the mobilization of assimilates to the grain [56-58]. We note  
371 that the *ysl3* mutant has significantly shorter flag leaves (**Fig. 4C** and **Table 1**). Flag leaves  
372 are the most efficient functional leaves at the grain filling stage and their size and shape are  
373 among the essential traits for ideal plant-type in crop breeding programs [59, 60]. We,  
374 therefore, speculate that the decreased grain length, width, and weight in the *ysl3* mutant  
375 compared to other plant lines are caused, in part, by reduced source strength of flag leaves  
376 which, in turn, is caused by a defect in the YSL3-mediated copper distribution to flag leaves,  
377 and thus their reduced growth.

378 In conclusion, this study expands our understanding of the molecular mechanisms of  
379 copper transport in crop species, discovers a new avenue of copper function in establishing

380 important agronomic traits and provides an important step towards the designing of  
381 biotechnological strategies aiming for sustainable and environmentally friendly grain yield  
382 improvement without the need for chemical fertilization in regions where poor soil quality is  
383 a major factor that limits crop productivity.

384

## 385 **Materials and methods**

### 386 **Plant Materials and Growth Conditions**

387 Wheat, *Triticum aestivum* (cv. *Bobwhite*) was used for analysis of the effect of copper on  
388 growth and reproduction. *B. distachyon* inbred line Bd21-3 regarded as wild-type [61] was  
389 used for the generation of *YSL3* mutant alleles, and transgenic plants expressing *YSL3<sub>pro</sub>-GUS*  
390 construct. The *ysl3-3* mutant allele described below was used for transformation to obtain  
391 *YSL3* complementary lines *YSL3-1* and *YSL3-2*. The generation of *YSL3* mutants and other  
392 transgenics plants is detailed in sections below. Depending on the experiment, plants were  
393 grown either in soil or hydroponically using procedures described in [27]. Briefly, after  
394 removing lamella and palea, seeds of different plant lines were surface sterilized for 10 min  
395 in a solution containing 10% bleach and 0.1% Tween 20 and then rinsed five times with  
396 deionized H<sub>2</sub>O. After the stratification for 24h at 4°C, seeds were sown in the water-rinsed  
397 perlite that was irrigated with ½ strength of the hydroponic solution (with or without copper).  
398 Seeds were germinated for 3 days under darkness at 24°C, then transferred to light and grown  
399 for 5 more days. The uniform seedlings were selected and transferred to soil or hydroponic  
400 solution. Hydroponic medium for both wheat and brachypodium contained 1 mM KNO<sub>3</sub>, 0.5  
401 mM MgSO<sub>4</sub>, 1 mM KH<sub>2</sub>PO<sub>4</sub>, 1 mM Ca (NO<sub>3</sub>)<sub>2</sub>, 2.5 μM NaCl, 25 μM Fe (III)-HEDTA, 3.5

402  $\mu\text{M}$   $\text{MnCl}_2$ ,  $0.25 \mu\text{M}$   $\text{ZnSO}_4$ ,  $0.25 \mu\text{M}$   $\text{CuSO}_4$ ,  $17.5 \mu\text{M}$   $\text{H}_3\text{BO}_3$ ,  $0.05 \mu\text{M}$   $\text{Na}_2\text{MoO}_4$  and  
403  $0.0025 \mu\text{M}$   $\text{CoCl}_2$  and this medium was replaced weekly. For achieving copper deficiency  
404 condition, plants were grown hydroponically for 3 weeks in a medium lacking copper.

405 Soil-grown plants were fertilized with the standard N-P-K fertilizer biweekly. To ensure  
406 that *YSL3* mutant alleles develop and produce seeds, when indicated,  $25 \mu\text{M}$   $\text{CuSO}_4$  was also  
407 added to the N-P-K fertilizer. In all cases, plants were grown at  $24^\circ\text{C}$ , 20-h-light/ $18^\circ\text{C}$ ,  
408 4-h-dark photoperiod and a photosynthetic flux density of  $150 \mu\text{mol photons m}^{-2} \text{s}^{-1}$  light  
409 produced with cool-white fluorescent bulbs supplemented by incandescent lighting and 75%  
410 relative humidity.

411

## 412 **Plasmid Construction**

413 A set of plasmids was prepared for functional complementation studies, analysis of the  
414 tissue-specificity of the expression and subcellular localization of *YSL3* in brachypodium,  
415 and for the generation of *YSL3* knockout plants.

416 The open reading frame (ORF, 2,115 bp) of *BdYSL3* without a stop codon was  
417 PCR-amplified from *Brachypodium* cDNA that was prepared from roots of plants grown  
418 hydroponically under control conditions. Three *YSL3* isoforms, Bradi5g17230.1  
419 Bradi5g17230.2 and Bradi5g17230.3 are annotated in the *Brachypodium* genome v3.1 [62].  
420 Because the Bradi5g17230.2 was listed as a prevailing *BdYSL3* isoform, its 2,115 bp ORF  
421 was amplified using primer pairs, *BdYSL3*-F and *BdYSL3*-R (Supplemental Table S1). The  
422 primer pairs also included *attB* sites for cloning of the PCR product by recombination into the  
423 entry *pDONR/Zeo* vector [63]. The fidelity of *BdYSL3* transcript was confirmed by

424 sequencing. *pDONR/Zeo-BdYSL3* was then used for recombination cloning into the binary  
425 *pSAT6-N1-EGFP-Gate* [64] to fuse *BdYSL3* at the C- terminal with EGFP and place it under  
426 the control of the cauliflower mosaic virus 35S promoter. The resultant  
427 *pSAT6-N1-EGFP-Gate* with or without *BdYSL3* insert was used for the analysis of the  
428 subcellular localization of *BdYSL3*-EGFP in protoplasts. To study the tissue and cell-type  
429 specificity of *YSL3* expression in *Brachypodium*, a putative promoter region of *BdYSL3*  
430 (-2207 to -1 bp from the translation initiation codon) was PCR-amplified from *Brachypodium*  
431 genomic DNA using primer pairs, *BdYSL3<sub>pro</sub>*-F and *BdYSL3<sub>pro</sub>*-R (Supplemental Table S1).  
432 The amplified fragments were introduced into the *pDONR/Zeo* entry vector. After confirming  
433 the fidelity of *BdYSL3<sub>pro</sub>* in the *pDONR/Zeo* vector by sequencing, *BdYSL3<sub>pro</sub>* was transferred  
434 by recombination into the Gateway vector, *pMDC164* [65] to fuse *BdYSL3<sub>pro</sub>* with the  
435 bacterial *uidA* gene encoding  $\beta$ -glucuronidase (GUS). *pMDC164* also carries *E. coli hptII*  
436 gene conferring resistance to hygromycin for the subsequent *in planta* selection.

437

### 438 **The Design of CRISPR/Cas9 Constructs**

439 To generate *YSL3* mutant alleles, we used RNA-guided DNA endonuclease system known as  
440 CRISPR/Cas9 (clustered regularly interspaced short palindromic repeats [CRISPR]  
441 /CRISPR-associated9 [Cas9] endonuclease) [66]. We used monocot-optimized CRISPR/Cas9  
442 vectors that have a modular design allowing multiplexing and targeting different loci within  
443 the same gene with different single-guide (sg)RNAs simultaneously to produce larger  
444 deletions [67, 68]. Specifically, we used the module A vector, *pMOD\_A1110*, that carries the  
445 wheat codon-optimized *Cas9* endonuclease gene under the control of *Zea mays Ubi* promoter,

446 modules B and C entry vectors, *pMOD\_B2518* and *pMOD\_C2518*, respectively for cloning  
447 individual sgRNAs under the control of *TaU6* promoter, and the final destination vector,  
448 *pTRANS\_250d* [68]. We designed CRISPR/Cas9 constructs containing two sgRNAs per  
449 construct with the intent to create larger deletions within *BdYSL3* coding sequence. Thus, we  
450 designed three sgRNAs (sgRNA1, sgRNA2, sgRNA3) within the 5' untranslated region  
451 (UTR) and the first exon of *BdYSL3*, respectively (**Supplemental Figures 3 and 4**). The  
452 targeted regions contained the CAS9-recognizing 5'-NGG protospacer adjacent motif (PAM),  
453 adjacent to the 20-bp target DNA. The lack of the off-target mutations was confirmed using  
454 the CRISPR-P 1.0 web tool (<http://crispr.hzau.edu.cn/CRISPR/>, [69]). The sgRNA1 and  
455 sgRNA2 were separated by 116 bp while sgRNA2 and sgRNA3 were separated by 149 bp  
456 (**Supplemental Figures 3 and 4**). sgRNA oligos were hybridized and annealed prior to  
457 cloning into the *Esp3I* site of the *pMOD\_B2518* (for sgRNA1 or sgRNA2) and  
458 *pMOD\_C2518* (for sgRNA2 or sgRNA3). The *pMOD\_A1110* carrying *TaCas9* and two entry  
459 vectors *pMOD\_B2518* and *pMOD\_C2518* carrying sgRNA1 and 2, respectively or  
460 *pMOD\_B2518* and *pMOD\_C2518* carrying sgRNA2 and 3, respectively were combined by  
461 Golden Gate cloning [70] with the destination vector, *pTRANS\_250d* to generate two  
462 *CRISPR/Cas9* destination vectors containing with sgRNA1 and sgRNA2 (sgRNAs1+2) or  
463 sgRNA2 and sgRNA3 (sgRNAs2+3); these two vectors were designated *pHS\_YSL3(1+2)*  
464 and *pHS\_YSL3(2+3)*, respectively.

465

#### 466 ***Agrobacterium tumefaciens*-mediated Transformation of *B. distachyon***

467 The *pMDC164* vector containing *BdYLS3<sub>pro</sub>-GUS*, or pSATN-EGFP-Gate vector with

468 *BdYSL3* insert, or CRISPR/Cas 9 vectors, *pHS\_YSL3(1+2)* and *pHS\_YSL3(2+3)* were  
469 transformed by electroporation into *Agrobacterium tumefaciens AGL1* strain. All vectors  
470 contained the *E.coli hptII* gene conferring resistance to hygromycin for the subsequent *in*  
471 *planta* selection. Brachypodium transformation was done as described in [61]. Briefly,  
472 embryos were dissected from immature seeds of brachypodium and placed on callus  
473 induction medium (CIM) for 7 weeks. The formed callus was then inoculated with *A.*  
474 *tumefaciens* containing a construct of interest. After 3 days of co-cultivation, callus was  
475 transferred to a transformants selection medium containing 20 µg/ml hygromycin. After 6  
476 weeks of selection, hygromycin-resistant callus was transferred to the regeneration medium.  
477 When plantlets were approximately 5 cm tall, they were transferred to clear tubes with  
478 Murasige/Skoog (MS) medium for rooting and the well-rooted plants were transplanted to  
479 soil for subsequent genotyping and seed harvesting.

480

#### 481 **PCR Genotyping of CRISPR/Cas9 lines and Sequencing**

482 Genomic DNA was extracted from leaves (0.1 g) using a standard cetyl-trimethyl-ammonium  
483 bromide method[71]. Twenty-five transgenic T0 lines (13 for *pHZ\_YSL3 (1+2)* and 12 lines  
484 for *pHZ\_YSL3(2+3)*) were PCR-genotyped for the presence of deletions in the *YSL3* gene  
485 using primer pairs upstream the sgRNA1 (Genotyping-F) and downstream the sgRNA3  
486 (Genotyping-R) (Supplemental Table S1). Deletion lines were selected by the band size and  
487 T1 generation of homozygous deletion lines was re-genotyped for the absence of *Cas9* gene  
488 using primer pairs indicated in Supplemental Table S1. Two Cas9-free deletion lines per each  
489 construct were re-genotyped for the presence of deletion using primer pairs Genotyping F and

490 Genotyping R (**Supplemental Table S1**). PCR products were loaded onto 1% (w/v) agarose  
491 gel, excised from gel, purifying and cloned into the *pGEM-T Easy* vector (Promega) for  
492 sequencing using SP6 and T7 primers. DNA sequencing results were analyzed against the  
493 *Brachypodium* genome v3.1 [62]. Sequence alignments were done using DNAMAN  
494 software.

495

### 496 **Tissue- and Cell-type Specificity of *YSL3* Expression**

497 *Brachypodium* Bd21-3 inbred line was transformed with *pMDC164* vector containing  
498 *BdYLS3<sub>pro</sub>-GUS*. Five out of the 13 independent transgenic lines (T1 generation) were used  
499 for GUS staining. Samples, collected from plants grown hydroponically with or without  
500 copper were fixed in 90% acetone on ice for 15 min. After washing thoroughly with ddH<sub>2</sub>O,  
501 samples were incubated at 37°C overnight in GUS staining solution containing 1 mM  
502 K<sub>3</sub>[Fe(CN)<sub>6</sub>], 1 mM 5-bromo-4-chloro-3-indolyl-β-D-glucuronide (X-Gluc), 100 mM sodium  
503 phosphate buffer (pH 7.0), 10 mM Na<sub>2</sub>EDTA and 0.1 % (v/v) TritonX-100[72]. After staining,  
504 samples were soaked 5 times (3-4 h each time) in 90% ethanol to remove chlorophyll that  
505 interferes with observation of the blue GUS stain. Hand-cut sections were prepared from  
506 stems using a feather double-edge razor blade. Staining patterns were analyzed using the  
507 Zeiss 2000 stereomicroscope. Images were collected using a Canon PowerShot S3 IS digital  
508 camera and a CS3IS camera adapter. Images were processed using the Adobe Photoshop  
509 software package, version 12.0.

510

### 511 **Functional Complementation Assays in the *Brachypodium ysl3 -3* Mutant**

512 The pSATN-EGFP-Gate vector containing the *BdYSL3* cDNA insert was transformed into the  
513 *ysl3-3* mutant allele using the described above *Agrobacterium*-mediated transformation. Two  
514 independent transgenic lines, *YSL3-1* and *YSL3-2* were selected for functional  
515 complementation assays. For plants growing hydroponically, four-week- old plants were  
516 imaged prior to tissue harvesting and biomass analysis. For plants grown in soil, days from  
517 germination to flowering were recorded for each genotype. Spike phenotypes were  
518 photographed. The floret number was estimated when seeds were ready for harvesting. The  
519 fertility was calculated as number of filled seeds per number of florets. Seed weight were  
520 measured as 1000 seeds' weight.

521

### 522 **Subcellular Localization of BdYSL3**

523 To study the subcellular localization of BdYSL3, pSATN-EGFP-Gate vector with or without  
524 *BdYSL3* cDNA insert was transfected into *A. thaliana* protoplasts by a polyethylene glycol–  
525 mediated method as described [73]. EGFP-mediated fluorescence and chlorophyll  
526 auto-fluorescence were visualized using FITC (for EGFP) or rhodamine (for chlorophyll)  
527 filter sets of the Axio Imager M2 microscope equipped with the motorized Z-drive (Zeiss).  
528 Images were obtained using the high-resolution 25 AxioCam MR Camera and processed  
529 using the Adobe Photoshop software package, version 12.0.

530

### 531 **RNA Extraction and RT-qPCR Analysis**

532 Brachypodium tissues were collected from plants grown either in soil or hydroponically with  
533 or without Cu as described above. Because the expression of copper-responsive genes can be



534 affected by the circadian rhythms [74], samples were collected at fixed time between 7 and 8  
535 Zeitgeber hour, where the Zeitgeber hour 1 is defined as the first hour of light after the dark  
536 period. Two micrograms of total RNA extracted with the TRIzol reagent (Invitrogen) was  
537 used as a template for cDNA synthesis with the Affinity Script QPCR cDNA Synthesis Kit  
538 (Agilent Technologies). RT-qPCR and data analysis were performed as described in [75]. The  
539 expression of *ACTIN2* gene was used for data normalization. Relative expression ( $\Delta\Delta C_t$ ) and  
540 fold difference ( $2^{-\Delta\Delta C_t}$ ) were calculated using the CFX Manager Software, version 1.5  
541 (Bio-Rad). The gene-specific primers are listed in Supplemental Table S1.

542

#### 543 **Elemental Analysis**

544 Elemental analysis was performed using inductively coupled plasma mass spectrometry  
545 (ICP-MS) as described in [75, 76]. Briefly, for analysis of metal concentration in roots and  
546 young leaves, plants were grown hydroponically as described above. Root tissues were  
547 collected and desorbed in 10 mM EDTA for 5 min followed by washing in a solution of 0.3  
548 mM BPS and 5.7 mM sodium dithionite for 10 min before rinsing three times with deionized  
549 water. For the analysis of metal concentration in flag leaves, flowers and seeds, plant lines  
550 were grown in soil. The metal concentration was determined by ICP-MS (Agilent 7700) after  
551 diluted to 10 ml with deionized water.

552

#### 553 **Synchrotron X-ray Fluorescence (SXRF) Microscopy**

554 Two-dimensional synchrotron x-ray fluorescence microscopy imaging the spatial distribution  
555 of copper in fresh tissues including leaves and flowers was done at the F3 station at the

556 Cornell High Energy Synchrotron Source (CHESS). Imaging of copper distribution in nodes  
557 was done using two dimensional confocal SXRF (2D-CXRF) at beamline 5-ID (SRX) of  
558 National Synchrotron Light Source (NSLS). A detailed description of procedures is provided  
559 in the Supplementary Information.

560

### 561 **Pollen Viability Assays**

562 Plants were grown in soil as described above. Pollen viability was analyzed using double  
563 staining with fluorescein diacetate and propidium iodide as described [77]. Briefly,  
564 fluorescein diacetate (2 mg/mL) was prepared in acetone and added drop by drop into 17%  
565 sucrose. Propidium iodide (1 mg/mL made in water) was diluted to a final concentration of  
566 100  $\mu$ L/mL with 17% sucrose (w/v). Anthers were dissected from flowers under the stereo  
567 microscope and pollen was released by tapping into the Eppendorf tube containing  
568 fluorescein diacetate and propidium iodide solutions mixed in 1:1 ratio prior to fluorescence  
569 microscopy. Pollens were imaged under the Axio Imager M2 microscope (Zeiss, Inc) using  
570 FITC and Texas red filter sets to visualize fluorescein- and propidium iodide-mediated  
571 fluorescence. Viable pollen was stained green because live cells uptake fluorescein diacetate  
572 and convert it to fluorescein, which emits blue-green light under UV irradiation [78].  
573 Unviable pollen was red because while propidium iodide is excluded from living cells, it  
574 labels dead cells with red-orange fluorescence under UV irradiation [79]. The number of  
575 viable and aborted pollens was counted in 10 sample microscope fields in each of three  
576 independent experiments. Images were collected with the high-resolution AxioCam MR  
577 camera and processed using the Adobe Photoshop software package, version 12.0.

578

### 579 **Pollen Germination Assays**

580 Florets, collected from soil-grown plants were incubated for 1h at 4°C prior to anther  
581 dissection and pollen collection. Pollen was germinated in the medium containing 1 mM  
582 CaCl<sub>2</sub>, 1 mM KCl, 0.8 mM MgSO<sub>4</sub>, 1.6 mM H<sub>3</sub>BO<sub>3</sub>, 30 μM CaSO<sub>4</sub>, 0.03% casein, 0.3%  
583 MES, 10% sucrose and 12.5% polyethylene glycol [23] . Germination was scored after 3-4 h  
584 of incubation at 24 °C.

585

### 586 **Statistical Analysis**

587 All the presented data are the mean values of three independent experiments. SPSS 20.0  
588 (SPSS, Chicago, IL, USA) and JMP Pro 14.0.0 (SAS) was utilized for statistical analyses.  
589 Individual differences among means were determined using Student's *t*-test of one-way  
590 ANOVA at a significance level of  $p < 0.05$ .

591

### 592 **Acknowledgements**

593 We would like to thank Professor Mark Sorrells and Ellie Taagen (Cornell University) for  
594 providing *T. aestivum* seeds and for assisting in using the WinSEEDLE™ of STD4800  
595 Scanner. We would like to thank Haoyu Lin for help in phenotyping wheat; 2D-CXRF  
596 experiments used resources of the National Synchrotron Light Source II, a U.S. Department  
597 of Energy (DOE) Office of Science User Facility operated for the DOE Office of Science by  
598 Brookhaven National Laboratory under Contract No. DE-SC0012704. H.S. was supported by  
599 National Natural Science Foundation of China (# 31301349, 30870154, 30901052, 30900087)

600 award to Y.Z. and The Schwartz Research Fund for Women in Life Sciences awarded to  
601 O.K.V, This study was funded by USDA/NIFA NYC-125542, NSF-IOS #1656321, The  
602 Schwartz Research Fund for Women in Life Sciences awarded to O.K.V., and  
603 CRDF-GLOBAL U.S.-Ukraine Competition OISE-9531011, awarded to O.K.V., O.I.T and  
604 N.D.R.

605

#### 606 **Author Contributions**

607 O.K.V. designed experiments with H.S.; H.S., Y.J., M.R.I, J.-C.C., P.M., T.Z., and Y.K.,  
608 performed experiments; T.D. assisted in ICP-MS analysis; R.H., L.S. and A.W. facilitated the  
609 SXRF experiments at CHESS and NSLSII (Brookhaven National labs). Y.Z., O.I.T., N.D.R.  
610 contributed to discussion on the manuscript. The manuscript was written by O.K.V and H.S.  
611 All authors contributed constructive comments on the manuscript.

---

## References

- 612  
613  
614 1. Godfray, H.C.J., et al., *Food Security: The Challenge of Feeding 9 Billion People*.  
615 Science, 2010. **327**(5967): p. 812-818.
- 616 2. Shorrocks, V.M. and B.J. Alloway, *Copper in plant, animal and human nutrition*.  
617 1988, Potters Bar, Hertfordshire: Copper Development Association. 106.
- 618 3. Mitra, G.N., *Regulation of Nutrient Uptake by Plants. A Biochemical and Molecular*  
619 *Approach*. 2015, New Delhi, India: Springer India. 195.
- 620 4. White, P.J. and M.R. Broadley, *Biofortification of crops with seven mineral elements*  
621 *often lacking in human diets - iron, zinc, copper, calcium, magnesium, selenium and*  
622 *iodine*. New Phytologist, 2009. **182**(1): p. 49-84.
- 623 5. Solberg, E., I. Evans, and D. Penny, *Copper deficiency: Diagnosis and correction*.  
624 *Agri-facts. Soil Fertility/Crop Nutrition. Alberta Agriculture, Food and Rural*  
625 *Development, Agdex 532-3, pp. 1-9*. 1999.
- 626 6. Yan, J., et al., *Arabidopsis Pollen Fertility Requires the Transcription Factors CITF1*  
627 *and SPL7 That Regulate Copper Delivery to Anthers and Jasmonic Acid Synthesis*.  
628 The Plant Cell, 2017. **29**(12): p. 3012-3029.
- 629 7. Burkhead, J.L., et al., *Copper homeostasis*. New Phytologist, 2009. **182**(4): p.  
630 799-816.
- 631 8. Schroeder, J.I., et al., *Using membrane transporters to improve crops for sustainable*  
632 *food production*. Nature, 2013. **497**(7447): p. 60-66.
- 633 9. Tshikunde, N.M., et al., *Agronomic and Physiological Traits, and Associated*  
634 *Quantitative Trait Loci (QTL) Affecting Yield Response in Wheat (Triticum aestivum*  
635 *L.): A Review*. Frontiers in plant science, 2019. **10**: p. 1428-1428.
- 636 10. Sancenon, V., et al., *Identification of a copper transporter family in Arabidopsis*  
637 *thaliana*. Plant Mol Biol, 2003. **51**(4): p. 577-87.
- 638 11. Kampfenkel, K., et al., *Molecular Characterization of a Putative Arabidopsis*  
639 *thaliana Copper Transporter and Its Yeast Homologue*. Journal of Biological  
640 Chemistry, 1995. **270**(47): p. 28479-28486.
- 641 12. Jung, H.I., et al., *COPT6 is a plasma membrane transporter that functions in copper*  
642 *homeostasis in Arabidopsis and is a novel target of SQUAMOSA promoter-binding*  
643 *protein-like 7*. J Biol Chem, 2012. **287**(40): p. 33252-67.
- 644 13. Gayomba, S.R., et al., *The CTR/COPT-dependent copper uptake and SPL7-dependent*  
645 *copper deficiency responses are required for basal cadmium tolerance in A. thaliana*.  
646 Metallomics, 2013. **5**(9): p. 1262-75.
- 647 14. DiDonato, R.J., et al., *Arabidopsis Yellow Stripe-Like2 (YSL2): a metal-regulated*  
648 *gene encoding a plasma membrane transporter of nicotianamine-metal complexes*.  
649 The Plant Journal, 2004. **39**(3): p. 403-414.
- 650 15. Waters, B., et al., *Mutations in Arabidopsis yellow stripe-like 1 and yellow stripe-like*  
651 *3 reveal their roles in metal ion homeostasis and loading of metal ions in seeds*. Plant  
652 Physiol, 2006. **141**: p. 1446 - 1458.
- 653 16. Chu, H.H., et al., *Successful reproduction requires the function of Arabidopsis Yellow*  
654 *Stripe-Like1 and Yellow Stripe-Like3 metal-nicotianamine transporters in both*  
655 *vegetative and reproductive structures*. Plant Physiol, 2010. **154**(1): p. 197-210.

- 656 17. Abdel-Ghany, S.E., et al., *Two P-Type ATPases Are Required for Copper Delivery in*  
657 *Arabidopsis thaliana* Chloroplasts. *The Plant Cell*, 2005. **17**(4): p.  
658 1233-1251.
- 659 18. Bernal, M., et al., *Transcriptome Sequencing Identifies SPL7-Regulated Copper*  
660 *Acquisition Genes FRO4/FRO5 and the Copper Dependence of Iron Homeostasis in*  
661 *Arabidopsis*. *The Plant Cell Online*, 2012. **24**(2): p. 738-761.
- 662 19. Yamasaki, H., et al., *SQUAMOSA Promoter Binding Protein-Like7 Is a Central*  
663 *Regulator for Copper Homeostasis in Arabidopsis*. *The Plant Cell*, 2009. **21**(1): p.  
664 347-361.
- 665 20. Jung, H.-i., et al., *Brachypodium distachyon as a model system for studies of copper*  
666 *transport in cereal crops*. *Frontiers in Plant Science*, 2014. **5**.
- 667 21. Yuan, M., et al., *Molecular and functional analyses of COPT/Ctr-type copper*  
668 *transporter-like gene family in rice*. *BMC Plant Biology*, 2011. **11**(1): p. 69.
- 669 22. Zheng, L., et al., *YSL16 Is a Phloem-Localized Transporter of the*  
670 *Copper-Nicotianamine Complex That Is Responsible for Copper Distribution in Rice*.  
671 *The Plant Cell*, 2012. **24**(9): p. 3767-3782.
- 672 23. Zhang, C., et al., *OsYSL16 is Required for Preferential Cu Distribution to Floral*  
673 *Organs in Rice*. *Plant and Cell Physiology*, 2018. **59**(10): p. 2039-2051.
- 674 24. Schwacke, R., et al., *ARAMEMNON, a Novel Database for Arabidopsis Integral*  
675 *Membrane Proteins*. *Plant Physiology*, 2003. **131**(1): p. 16-26.
- 676 25. Kakei, Y., et al., *OsYSL16 plays a role in the allocation of iron*. *Plant molecular*  
677 *biology*, 2012. **79**(6): p. 583-594.
- 678 26. Lee, S., et al., *Activation of rice Yellow Stripe1-Like 16 (OsYSL16) enhances iron*  
679 *efficiency*. *Molecules and cells*, 2012. **33**(2): p. 117-126.
- 680 27. Jung, H.-I., et al., *Brachypodium distachyon as a model system for studies of copper*  
681 *transport in cereal crops*. *Frontiers in plant science*, 2014. **5**: p. 236-236.
- 682 28. Yordem, B.K., et al., *Brachypodium distachyon as a new model system for*  
683 *understanding iron homeostasis in grasses: phylogenetic and expression analysis of*  
684 *Yellow Stripe-Like (YSL) transporters*. *Annals of Botany*, 2011. **108**(5): p. 821-833.
- 685 29. Derbyshire, P. and M.E. Byrne, *MORE SPIKELETS1 Is Required for Spikelet Fate in*  
686 *the Inflorescence of Brachypodium*. *Plant Physiology*, 2013. **161**(3): p. 1291-1302.
- 687 30. Scholthof, K.-B.G., et al., *Brachypodium: A Monocot Grass Model Genus for Plant*  
688 *Biology*. *The Plant cell*, 2018. **30**(8): p. 1673-1694.
- 689 31. Yamaji, N. and J.F. Ma, *The node, a hub for mineral nutrient distribution in*  
690 *graminaceous plants*. *Trends in Plant Science*, 2014. **19**(9): p. 556-563.
- 691 32. Agyeman-Budu, D.N., et al., *Germanium Collimating micro-Channel Arrays For*  
692 *High Resolution, High Energy Confocal X-ray Fluorescence Microscopy*. *Icxom23:*  
693 *International Conference on X-Ray Optics and Microanalysis*, 2016. **1764**.
- 694 33. Mantouvalou, I., W. Malzer, and B. Kanngiesser, *Quantification for 3D micro X-ray*  
695 *fluorescence*. *Spectrochimica Acta Part B-Atomic Spectroscopy*, 2012. **77**: p. 9-18.
- 696 34. Bailey-Serres, J., et al., *Genetic strategies for improving crop yields*. *Nature*, 2019.  
697 **575**(7781): p. 109-118.
- 698 35. Ingram, J.S.I. and J.R. Porter, *Plant science and the food security agenda*. *Nature*  
699 *Plants*, 2015. **1**(11): p. 15173.

- 700 36. White, P.J., *Chapter 3 - Long-distance Transport in the Xylem and Phloem A2 -*  
701 *Marschner, Petra*, in *Marschner's Mineral Nutrition of Higher Plants (Third Edition)*.  
702 2012, Academic Press: San Diego. p. 49-70.
- 703 37. Denis, M., *Structure and function of cytochrome-c oxidase*. *Biochimie*, 1986. **68**(3): p.  
704 459-470.
- 705 38. Radin, I., et al., *The Arabidopsis COX11 Homolog is Essential for Cytochrome c*  
706 *Oxidase Activity*. *Frontiers in plant science*, 2015. **6**: p. 1091-1091.
- 707 39. Tvrda, E., et al., *Iron and copper in male reproduction: a double-edged sword*.  
708 *Journal of assisted reproduction and genetics*, 2015. **32**(1): p. 3-16.
- 709 40. Edlund, A.F., R. Swanson, and D. Preuss, *Pollen and Stigma Structure and Function:*  
710 *The Role of Diversity in Pollination*. *The Plant Cell*, 2004. **16**(suppl 1): p. S84-S97.
- 711 41. Pautler, M., et al., *Grass Meristems I: Shoot Apical Meristem Maintenance, Axillary*  
712 *Meristem Determinacy and the Floral Transition*. *Plant and Cell Physiology*, 2013.  
713 **54**(3): p. 302-312.
- 714 42. Tanaka, W., et al., *Grass Meristems II: Inflorescence Architecture, Flower*  
715 *Development and Meristem Fate*. *Plant and Cell Physiology*, 2013. **54**(3): p. 313-324.
- 716 43. Landrein, B., et al., *Nitrate modulates stem cell dynamics in <em>Arabidopsis</em>*  
717 *shoot meristems through cytokinins*. *Proceedings of the National Academy of*  
718 *Sciences*, 2018. **115**(6): p. 1382-1387.
- 719 44. Barazesh, S. and P. McSteen, *Hormonal control of grass inflorescence development*.  
720 *Trends in Plant Science*, 2008. **13**(12): p. 656-662.
- 721 45. Satoh-Nagasawa, N., et al., *A trehalose metabolic enzyme controls inflorescence*  
722 *architecture in maize*. *Nature*, 2006. **441**(7090): p. 227-230.
- 723 46. Claeys, H., et al., *Control of meristem determinacy by trehalose 6-phosphate*  
724 *phosphatases is uncoupled from enzymatic activity*. *Nature Plants*, 2019. **5**(4): p.  
725 352-357.
- 726 47. Vollbrecht, E., et al., *Architecture of floral branch systems in maize and related*  
727 *grasses*. *Nature*, 2005. **436**(7054): p. 1119-1126.
- 728 48. Bortiri, E., et al., *ramosa2 Encodes a LATERAL ORGAN BOUNDARY Domain*  
729 *Protein That Determines the Fate of Stem Cells in Branch Meristems of Maize*. *The*  
730 *Plant Cell*, 2006. **18**(3): p. 574-585.
- 731 49. Holt, A.L., et al., *Signaling in shoot and flower meristems of Arabidopsis thaliana*.  
732 *Current Opinion in Plant Biology*, 2014. **17**: p. 96-102.
- 733 50. D'Ario, M., S. Griffiths-Jones, and M. Kim, *Small RNAs: Big Impact on Plant*  
734 *Development*. *Trends in Plant Science*, 2017. **22**(12): p. 1056-1068.
- 735 51. Peñarrubia, L., et al., *Temporal aspects of copper homeostasis and its crosstalk with*  
736 *hormones*. *Frontiers in plant science*, 2015. **6**: p. 255-255.
- 737 52. Pilon, M., *The copper microRNAs*. *New Phytologist*, 2017. **213**(3): p. 1030-1035.
- 738 53. Derbyshire, P. and M. Byrne, *MORE SPIKELETS1 is required for spikelet fate in the*  
739 *inflorescence of Brachypodium distachyon*. *Plant physiology*, 2013. **161**.
- 740 54. Bonnett, O.T., *The development of the wheat spike*. *Journal of Agricultural Research*,  
741 1936. **53**: p. 0445-0451.
- 742 55. Kellogg, E.A., *Floral displays: genetic control of grass inflorescences*. *Current*  
743 *Opinion in Plant Biology*, 2007. **10**(1): p. 26-31.

- 744 56. Distelfeld, A., R. Avni, and A.M. Fischer, *Senescence, nutrient remobilization, and*  
745 *yield in wheat and barley*. Journal of Experimental Botany, 2014. **65**(14): p.  
746 3783-3798.
- 747 57. Li, N., et al., *Control of grain size in rice*. Plant Reproduction, 2018. **31**(3): p.  
748 237-251.
- 749 58. Brinton, J. and C. Uauy, *A reductionist approach to dissecting grain weight and yield*  
750 *in wheat*. Journal of Integrative Plant Biology, 2019. **61**(3): p. 337-358.
- 751 59. Li, R., et al., *The extent of parental genotypic divergence determines maximal*  
752 *heterosis by increasing fertility in inter-subspecific hybrids of rice (Oryza sativa L.)*.  
753 Molecular Breeding, 1998. **4**(3): p. 205-214.
- 754 60. Zhang, B., et al., *Genetic analysis of flag leaf size and candidate genes determination*  
755 *of a major QTL for flag leaf width in rice*. Rice, 2015. **8**(1): p. 2.
- 756 61. Vogel, J. and T. Hill, *High-efficiency Agrobacterium-mediated transformation of*  
757 *Brachypodium distachyon inbred line Bd21-3*. Plant Cell Reports, 2008. **27**(3): p.  
758 471-478.
- 759 62. The International Brachypodium, I., et al., *Genome sequencing and analysis of the*  
760 *model grass Brachypodium distachyon*. Nature, 2010. **463**: p. 763.
- 761 63. Gehl, C., et al., *New GATEWAY vectors for high throughput analyses of*  
762 *protein-protein interactions by bimolecular fluorescence complementation*. Mol Plant,  
763 2009. **2**(5): p. 1051-8.
- 764 64. Jung, H.-i., et al., *COPT6 Is a Plasma Membrane Transporter That Functions in*  
765 *Copper Homeostasis in Arabidopsis and Is a Novel Target of SQUAMOSA*  
766 *Promoter-binding Protein-like 7*. Journal of Biological Chemistry, 2012. **287**(40): p.  
767 33252-33267.
- 768 65. Curtis, M.D. and U. Grossniklaus, *A Gateway Cloning Vector Set for*  
769 *High-Throughput Functional Analysis of Genes in Planta*. Plant Physiology, 2003.  
770 **133**(2): p. 462-469.
- 771 66. Liu, L. and X.-D. Fan, *CRISPR-Cas system: a powerful tool for genome engineering*.  
772 Plant Molecular Biology, 2014. **85**(3): p. 209-218.
- 773 67. Brooks, C., et al., *Efficient Gene Editing in Tomato in the First Generation Using the*  
774 *Clustered Regularly Interspaced Short Palindromic Repeats/CRISPR-Associated9*  
775 *System*. Plant Physiology, 2014. **166**(3): p. 1292-1297.
- 776 68. Čermák, T., et al., *A Multipurpose Toolkit to Enable Advanced Genome Engineering*  
777 *in Plants*. The Plant Cell, 2017. **29**(6): p. 1196-1217.
- 778 69. Lei, Y., et al., *CRISPR-P: A Web Tool for Synthetic Single-Guide RNA Design of*  
779 *CRISPR-System in Plants*. Molecular Plant, 2014. **7**(9): p. 1494-1496.
- 780 70. Weber, E., et al., *Assembly of Designer TAL Effectors by Golden Gate Cloning*. PLOS  
781 ONE, 2011. **6**(5): p. e19722.
- 782 71. Porebski, S., L.G. Bailey, and B.R. Baum, *Modification of a CTAB DNA extraction*  
783 *protocol for plants containing high polysaccharide and polyphenol components*. Plant  
784 molecular biology reporter, 1997. **15**(1): p. 8-15.
- 785 72. Inoue, H., et al., *Three rice nicotianamine synthase genes, OsNAS1, OsNAS2, and*  
786 *OsNAS3 are expressed in cells involved in long -distance transport of iron and*  
787 *differentially regulated by iron*. The Plant Journal, 2003. **36**(3): p. 366-381.



- 
- 788 73. Zhai, Z., T. Sooksa-nguan, and O.K. Vatamaniuk, *Establishing RNA interference as a*  
789 *reverse-genetic approach for gene functional analysis in protoplasts*. *Plant Physiol*,  
790 2009. **149**(2): p. 642-52.
- 791 74. Perea-García, A., et al., *Modulation of copper deficiency responses by diurnal and*  
792 *circadian rhythms in Arabidopsis thaliana*. *Journal of Experimental Botany*, 2016.  
793 **67**(1): p. 391-403.
- 794 75. Yan, J., et al., *Arabidopsis Pollen Fertility Requires the Transcription Factors CITF1*  
795 *and SPL7 That Regulate Copper Delivery to Anthers and Jasmonic Acid Synthesis*.  
796 *The Plant cell*, 2017. **29**(12): p. 3012-3029.
- 797 76. Zhai, Z., et al., *OPT3 Is a Phloem-Specific Iron Transporter That Is Essential for*  
798 *Systemic Iron Signaling and Redistribution of Iron and Cadmium in Arabidopsis*. *The*  
799 *Plant Cell*, 2014. **26**(5): p. 2249-2264.
- 800 77. Mandaokar, A. and J. Browse, *MYB108 acts together with MYB24 to regulate*  
801 *jasmonate-mediated stamen maturation in Arabidopsis*. *Plant Physiol*, 2009. **149**(2): p.  
802 851-62.
- 803 78. Heslop-Harrison, J. and Y. Heslop-Harrison, *Evaluation of pollen viability by*  
804 *enzymatically induced fluorescence; intracellular hydrolysis of fluorescein diacetate*.  
805 *Stain Technol*, 1970. **45**(3): p. 115-20.
- 806 79. Regan, S.M. and B.A. Moffatt, *Cytochemical Analysis of Pollen Development in*  
807 *Wild-Type Arabidopsis and a Male-Sterile Mutant*. *Plant Cell*, 1990. **2**(9): p. 877-889.

808

## 809 **Figure legends**

810 **Figure 1. Copper deficiency alters flower development and reduces grain number in**  
811 **wheat and brachypodium.** Plants were grown hydroponically under indicated copper  
812 concentrations. (A to D) show representative images of plants, tiller and head appearance  
813 under different copper concentrations of wheat (A, C) and brachypodium (B, D). (E) to (H)  
814 show the number of flowers and grains per plant in wheat (E, F) or brachypodium (G, H).  
815 Statistical analysis in (E) to (H) was done with one-way ANOVA in the JMP Pro 14 software  
816 package; comparison of the means for each pair was done using Student's *t*-test. E to H show  
817 mean values  $\pm$  S.E. from the analysis of 4 (wheat) to 6 (brachypodium) independently grown  
818 plants from one out of two (wheat) and three (brachypodium) independent experiments.  
819 Levels not connected by the same letter are significantly different ( $p < 0.05$ ).

820

821 **Figure 2. Copper deficiency increases transcript abundance of *YSL3*.** (A) The expression  
822 level of *YSL3* in different tissues at different growth stages. Wild-type *Brachypodium* was  
823 grown hydroponically under copper sufficient (0.25  $\mu$ M CuSO<sub>4</sub>) conditions. The indicated  
824 plant tissues were collected at the indicated time and developmental stage; RNA was  
825 extracted and subjected to RT-qPCR analysis. (B) The expression level of *YSL3* in different  
826 tissues of *Brachypodium* wild-type grown hydroponically under copper sufficient (+Cu) or  
827 deficient conditions (-Cu) conditions. Young (2 uppermost leaves) and mature leaves (the  
828 remaining leaves), stems and roots were collected from four-week-old plants. Flag leaves and  
829 flowers were collected from six-week-old plants. Copper deficiency was achieved by  
830 transferring plants to a fresh medium lacking copper one week prior to tissue sampling. A and

---

831 **B** show mean values from 3 independent experiments; error bars show S.E. Tissues were  
832 pooled from 3 plants per each experiment. Levels not connected by same letter are  
833 significantly different ( $p < 0.05$ ).

834  
835

836 **Figure 3. Tissue-specificity of the expression of *YSL3*.** Transgenic plants expressing  
837 *YSL3<sub>pro</sub>*-GUS construct were grown hydroponically for 3 (**A** to **C**) or 6 (**D** to **G**) weeks. Plants  
838 were transferred to hydroponic solution without copper (-Cu) for 1 week prior to  
839 histochemical analysis. (**A**) and (**B**) show representative images of GUS staining in the  
840 vasculature (**V**, black arrow) of lateral roots and the third emerged leaf, respectively.  
841 Transverse sections through a leaf lamina (**C**), and a node (**D**) show GUS staining in tissues  
842 indicated by black arrows. (**E**) shows a close-up of a vascular bundle embedded in a dashed  
843 box in (**D**). (**F**) shows GUS staining in dissected flowers of *YSL3<sub>pro</sub>*-GUS-expressing  
844 transgenics grown under copper deficiency. (**G**) shows GUS staining in the vasculature of the  
845 lemma of plants grown under copper deficiency. X-xylem vessels; Ph-phloem, Vb – vascular  
846 bundle; LS – leaf sheath of the node, V - vasculature; S – styles of pistils; Ov – ovary; LM –  
847 lemma; Bf – bulliform cells, Ad is the adaxial, Ab is the abaxial side of the leaf lamina.  
848 *YSL3<sub>pro</sub>*-GUS-mediated staining is indicated by black arrows. Open arrows point to other  
849 tissues and cell-types. GUS staining was not detected in plants grown under copper sufficient  
850 conditions. Scale bars: 100  $\mu$ m for **A**, **C**, **D**, **E** and 1 mm for **B**, **F**, **G**.

851

852 **Figure 4. The *ysl3-3* mutant has a delayed flowering time, altered inflorescence**  
853 **architecture and pollen viability.** The indicated plant lines were grown in soil and

---

854 fertilized bi-weekly with the N-P-K fertilizer. **(A)** shows a representative image of the *ysl3-3*  
855 mutant which was still in the vegetative stage in contrast to wild-type and *YSL3-1* and *YSL3-2*  
856 complementary lines that have reached the reproductive stage of the development. **(B)** shows  
857 days to flowering in each of the indicated plant lines. Mean values  $\pm$  S.E are shown ( $n = 3$   
858 independent experiment with at least 6 plants analyzed per each experiment). Levels not  
859 connected by same letter are significantly different ( $p < 0.05$ ). **(C)** shows a representative  
860 image of spikes with a flag leaf collected from plants grown in soil. In order to collect spikes  
861 of all plant lines simultaneously, the *ysl3-3* mutant has been germinated two weeks in  
862 advance to other plant lines. **(D)** shows the viability of pollen collected from the wild-type  
863 (Wt) and the *ysl3-3* mutant (*ysl3*), grown as described above. Mean values of 6 independently  
864 grown plants from three independent experiments are shown. Error bars show S.E. Levels not  
865 connected by same letter are significantly different ( $p < 0.05$ ). **(E)** *In vitro* pollen germination  
866 assay shows poor germination rate of the *ysl3-3* mutant compared to wild-type. Values are  
867 mean  $\pm$  SE of 4 and 7 independent experiments for wild-type and the *ysl3-3* mutant,  
868 respectively;  $n =$  number of pollens scored are shown below each bar. Levels not connected  
869 by same letter are significantly different ( $p < 0.01$ ). **(F)** shows the morphology of pistils  
870 collected from wild-type, the *ysl3-3* mutant, and the *YSL3-1* complementary line, all grown in  
871 soils and fertilized bi-weekly with N-P-K.

872

873 **Figure 5. Copper delivery to flag leaves and flowers is impaired in the *ysl3* mutant.**

874 ICP-MS- based analysis of the concentration of copper in roots **(A)**, mature leaves **(B)**, flag

875 leaves and flowers **(C)** of wild-type plants (**Wt**), the *ysl3-3* mutant (*ysl3*) and the *ysl3-3*

---

876 mutant expressing the *YSL3* cDNA (*YSL3-I*). **A** to **C** show mean values of 3 independent  
877 experiments, error bars show S.E. Levels not connected by the same letter are significantly  
878 different ( $p < 0.05$ ).

879

880 **Figure 6. The distribution of copper is altered in the *ysl3-3* mutant.** SXRF-based analysis  
881 of the spatial distribution of copper in mature leaves (**A**), flag leaves (**B**) and florets (**C**) of the  
882 indicated plant lines. Middle part of the leaf was used for SXRF imaging in both **A** and **B**.  
883 White arrows in **C** point to anthers (**An**), stigma (**S**) and ovaries (**Ov**). Scale bar = 2 mm.  
884 Mature leaves in (**A**) were collected from 3-week-old plants, grown hydroponically with 0.25  
885  $\mu\text{M}$   $\text{CuSO}_4$ . Flag leaves and florets were collected from soil-grown plants that were fertilized  
886 bi-weekly with N-P-K. (**D**) Two-dimensional confocal SXRF (2D-CSXRF) was used to  
887 visualize the spatial distribution of copper in node I of indicated plant lines. (**E**) illustrates the  
888 anatomy of the upper part of the node I. Part of the node in a rectangle was scanned using  
889 C-SXRF and is shown in **D**. Sh – leaf sheath, Vb- vascular bundle, Ph – phloem, X- xylem.

890

891 **Figure 7. Seeds of the *ysl3-3* mutant accumulate less copper, are smaller and lighter.**  
892 Grains were collected from soil-grown plants that were fertilized bi-weekly with N-P-K. (**A**)  
893 ICP-MS analysis of copper concentration in seeds of the indicated plant lines. **B**, **C** shows  
894 straight length and width, respectively of grains collected from the indicated plant lines.  
895 Grains were dehusked and the straight length and width of randomly selected grains was  
896 measured using the WinSEEDLE™ of STD4800 Scanner (Regent Instruments Inc., Canada,  
897 2015). (**D**) shows a representative image of seeds pooled from at least three plants from each

898 independent experiment (n=3). (E) shows the weight of 1000 dehusked grains of indicated  
899 plant lines. Presented values are arithmetic means  $\pm$  S.E. (n = 3 pools of seeds from five  
900 plants per each line; a representative result from 3 independent experimental set-ups is  
901 shown). Seeds were pooled together from five plants per line. Levels not connected by same  
902 letter are significantly different ( $p < 0.05$ ).

903

904 **Supplemental Figure 1. Copper deficiency affects flower development and reduces tiller**  
905 **and head number in wheat and brachypodium.** Plants were grown hydroponically under  
906 indicated copper concentrations. (A) and (B) show a representative image of spike  
907 appearance under different copper concentrations in wheat or brachypodium, respectively. (C)  
908 to (F) show the number of tillers and heads formed per plant in wheat (C, D) or  
909 brachypodium (E, F). Statistical analysis in (C) to (F) was done with one-way ANOVA in the  
910 JMP Pro 14 software package; comparison of the means for each pair was done using  
911 Student's *t*-test. C to F show mean values  $\pm$  S.E. from the analysis of 4 (wheat) to 6  
912 (brachypodium) independently grown plants from one out of two (wheat) and three  
913 (brachypodium) independent experiments. Levels not connected by same letter are  
914 significantly different ( $p < 0.05$ ).

915

916 **Supplemental Figure 2. BdYSL3 localizes to the plasma membrane in *A. thaliana***  
917 **protoplast.** *BdYSL3* fused with EGFP at the C-termini (A) or EGFP-expressing empty vector  
918 (B) were transfected into protoplasts prepared from *A. thaliana* mesophyll cells. Shown are  
919 bright field image (Bf) of transfected protoplasts, YSL3-EGFP (YSL3)-mediated

---

920 fluorescence, EGFP (**EGFP**) - mediated fluorescence and chlorophyll autofluorescence (**Chl**)  
921 fluorescence. Overlay images were created to show that YSL3-EGFP-mediated fluorescence  
922 does not co-localize with the chlorophyll-mediated fluorescence. Scale bar = 5  $\mu$ m.

923

924 **Supplemental Figure 3. Generation of CRISPR/Cas9 mutant alleles for YSL3.** (A) The  
925 schematic illustration of *BdYSL3* (Bradi5g17230.2) gene structure. Black boxes show exons,  
926 gray line show introns and 5' and 3' UTRs. The close-up marked by a dashed box shows  
927 *YSL3* region targeted by sgRNAs (gRNA1, gRNA2, gRNA3), shown as red bars. The  
928 expected deletion sizes are indicated. Blue arrows show the relative position of the forward  
929 (F) and reverse (R) genotyping primers. (B) PCR-based genotyping of four T1-generation of  
930 CRISPR/Cas9 transgenic lines of which lines 1 and 2 are from the transformation with a  
931 construct containing sgRNA2 and 3 (gRNA2+3) while lines 3 and 4 are from the  
932 transformation with a construct containing sgRNA1 and 2 (gRNA1+2). (C) shows results of  
933 PCR-based genotyping using primers against *Cas9* in the *CRISPR/Cas9* construct or against  
934 brachypodium *Actin*. Genomic DNA was isolated from a wild-type plant (**Wt**), T1 plants for  
935 lines 1 to 4 (1, 2, 3, 4) or a T0 plant (T0). The latter was used as a control for *Cas9*. (D) *ysl3*  
936 deletion lines and untransformed wild-type plants were grown hydroponically for 3 weeks  
937 with 0.25  $\mu$ M CuSO<sub>4</sub>. (E) Sequencing results of plant transformed with sgRNA 1 and 2 (lines  
938 3 and 4) show 122 and 123 bp deletion in plants. These mutant lines are designated *ysl3-1*  
939 and *ysl3-2*, respectively. Sequencing results of plant transformed with sgRNA 2 and 3 (lines 1  
940 and 2) show 182 bp deletion. Both lines represent the same allele which is designated as  
941 *ysl3-3*.

942

943 **Supplemental Figure 4.** The genomic DNA sequence of *YSL3* that was used for designing  
944 sgRNAs. The position of sgRNAs and sequencing primers are indicated in bold and blue font,  
945 respectively. The Protospacer Adjacent Motif (PAM) sequence is shown in red.

946

947 **Supplemental Figure 5. RT-qPCR analysis of *YSL3* transcript abundance in roots and**  
948 **leaves of *Brachypodium* wild-type (*Wt*), the *ysl3-3* mutant (*ysl3*) and two *ysl3-3* mutant**  
949 **transgenic lines expressing the *BdYSL3* cDNA (*YSL3-1*; *YSL3-2*).** Plants were grown  
950 hydroponically in the presence of 0.25  $\mu\text{M}$   $\text{CuSO}_4$ . Roots and shoots were collected from the  
951 4-week-old plants. *YSL3* expression in different plant lines are shown relative to its  
952 expression in leaves of *Wt* that was designated as 1. Error bars indicate S.E. ( $n = 3$  pools of  
953 plant tissues each collected from 3 plants. Levels not connected by same letter are  
954 significantly different ( $p < 0.05$ ).

955

956 **Supplemental Figure 6. *YSL3* is essential for the normal growth of *Brachypodium* under**  
957 **copper deficiency. (A).** Wild-type plants (*Wt*), the *ysl3-3* mutant (*ysl3*) and two *ysl3-3*  
958 mutant transgenic lines expressing the *BdYSL3* cDNA (*YSL3-1* and *YSL3-2*) were grown  
959 hydroponically with the indicated concentrations of  $\text{CuSO}_4$ . Representative photos of nine  
960 plants analyzed per each line were captured after three weeks of growth. **(B).** Representative  
961 images of top (youngest) leaves collected from plants grown hydroponically for 3 weeks with  
962 the indicated concentrations of  $\text{CuSO}_4$ . A white arrow points to a leaf with curled margins. **(C)**  
963 shows the height, **(D, E)** shows the biomass of the *Brachypodium* wild-type plants (*Wt*)



964 *ysl3-3* mutant (*ysl3*), and two *ysl3-3* mutant transgenic lines expressing the *BdYSL3* cDNA  
965 (*YSL3-1* and *YSL3-2*) grown hydroponically for 3 weeks with the indicated concentrations of  
966 CuSO<sub>4</sub>. **C** to **E** show mean values of 6 independently grown plants from three independent  
967 experiments, error bars show S.E. Levels not connected by same letter are significantly  
968 different ( $p < 0.05$ ).

969

970 **Supplemental Figure 7. The *ysl3-3* mutant is not sensitive to iron, manganese or zinc**  
971 **deficiency.** Indicated plant lines were germinated in perlite for 1 week, then a subset of plants  
972 was transferred to either to a complete hydroponic medium containing 1 μM CuSO<sub>4</sub> to allow  
973 growth of the *ysl3* mutant (Control), or the same medium that lack either manganese (-Mn) or  
974 iron (-Fe), or zinc (-Zn). Plants were photographed after 3 weeks. A representative image  
975 from three independent experiments is shown.

976 **Table 1. The *ysl3-3* mutant has altered flower morphology and fertility.**

977 Plant were grown in soil and fertilized bi-weekly with a standard N-P-K fertilizer. The *ysl3-3*  
978 mutant was also grown in soil and in addition to N-P-K was also fertilized bi-weekly with 25  
979  $\mu\text{M}$   $\text{CuSO}_4$  (*ysl3* +25  $\mu\text{M}$   $\text{CuSO}_4$ ). Spikes were collected at the end of reproductive stage. We  
980 note that because the *ysl3-3* mutant is developmentally delayed, its spikes were harvested and  
981 fertility was analyzed separately although all plant lines were sown and grown concurrently.  
982 Mean values  $\pm$  SE are shown (n = 15 plants per each genotype). Asterisks (\*) indicate statistically  
983 significant differences from the wild-type ( $p < 0.0001$ ).

984 <sup>a</sup>Spikelets include the terminal spikelet and lateral spikelets

985 <sup>b</sup>Florets number indicates the total florets produced per spike

986 <sup>c</sup>Seeds number indicates the total seeds produced per spike

987 <sup>d</sup>Fertile florets number was calculated as % of seeds formed per the number of florets per  
988 spike

989

| Genotype                                       | Flag leaf length (cm) | Spikelets <sup>a</sup> | Florets <sup>b</sup> | Seeds <sup>c</sup> | Fertile Florets (%) |
|------------------------------------------------|-----------------------|------------------------|----------------------|--------------------|---------------------|
| Wt                                             | 7.6 $\pm$ 0.23        | 3.8 $\pm$ 0.22         | 39.8 $\pm$ 3.09      | 29.0 $\pm$ 6.71    | 76.2 $\pm$ 1.35     |
| <i>ysl3-3</i>                                  | 4.9 $\pm$ 0.38*       | 7.7 $\pm$ 0.25*        | 70.0 $\pm$ 4.56*     | 31.0 $\pm$ 0.58    | 42.6 $\pm$ 3.33*    |
| <i>ysl3/YSL3-1</i>                             | 6.4 $\pm$ 0.44        | 4.8 $\pm$ 0.48         | 41.0 $\pm$ 2.52      | 31.3 $\pm$ 2.81    | 75.9 $\pm$ 3.76     |
| <i>ysl3</i> + 25 $\mu\text{M}$ $\text{CuSO}_4$ | 6.7 $\pm$ 0.56        | 5.0 $\pm$ 8.36         | 46.3 $\pm$ 8.36      | 29.0 $\pm$ 3.49    | 64.8 $\pm$ 4.92     |

990

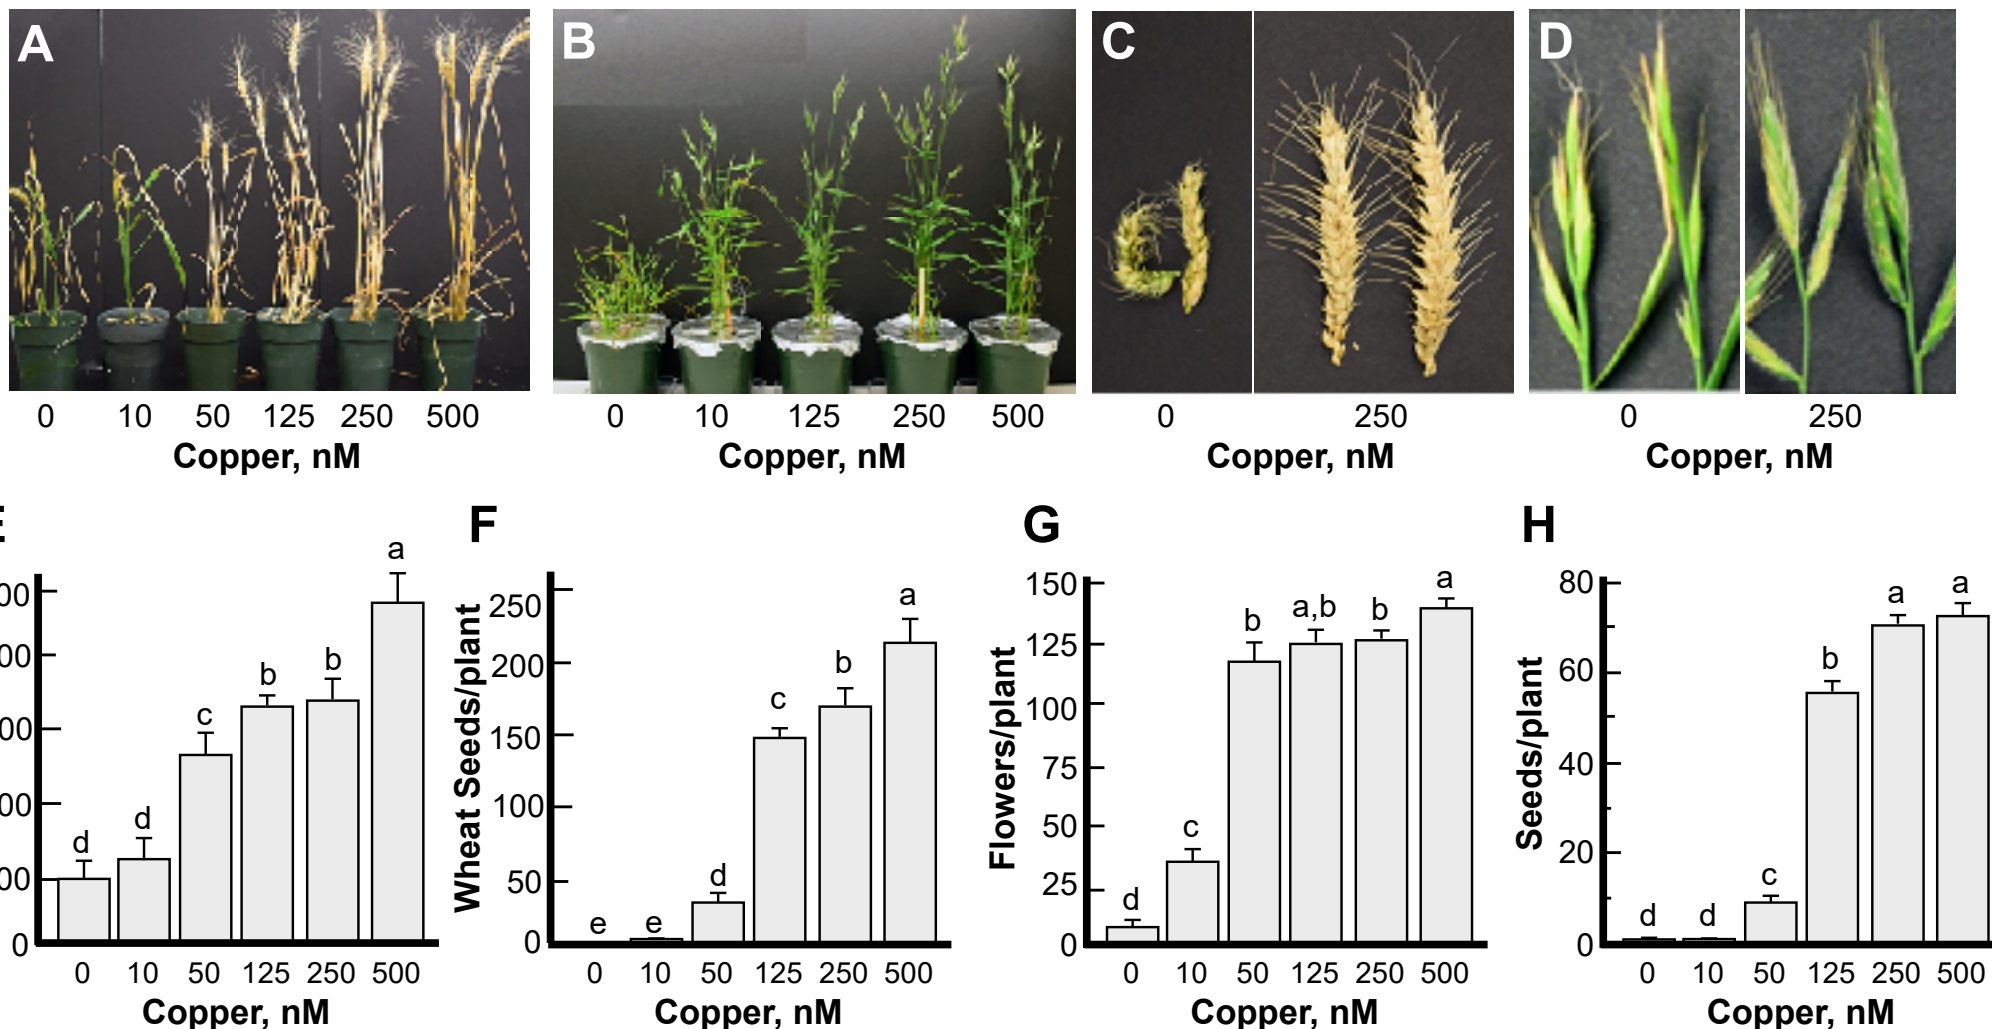

**Figure 1. Copper deficiency alters flower development and reduces grain number in wheat and brachypodium.** Plants were grown hydroponically under indicated copper concentrations. (A to D) show representative images of plants, tiller and head appearance under different copper concentrations of wheat (A, C) and brachypodium (B, D). (E) to (H) show the number of flowers and grains per plant in wheat (E, F) or brachypodium (G, H). Statistical analysis in (E) to (H) was done with one-way ANOVA in the JMP Pro 14 software package; comparison of the means for each pair was done using Student's *t*-test. E to H show mean values  $\pm$  S.E. from the analysis of 4 (wheat) to 6 (brachypodium) independently grown plants from one out of two (wheat) and three (brachypodium) independent experiments. Levels not connected by the same letter are significantly different ( $p < 0.05$ ).

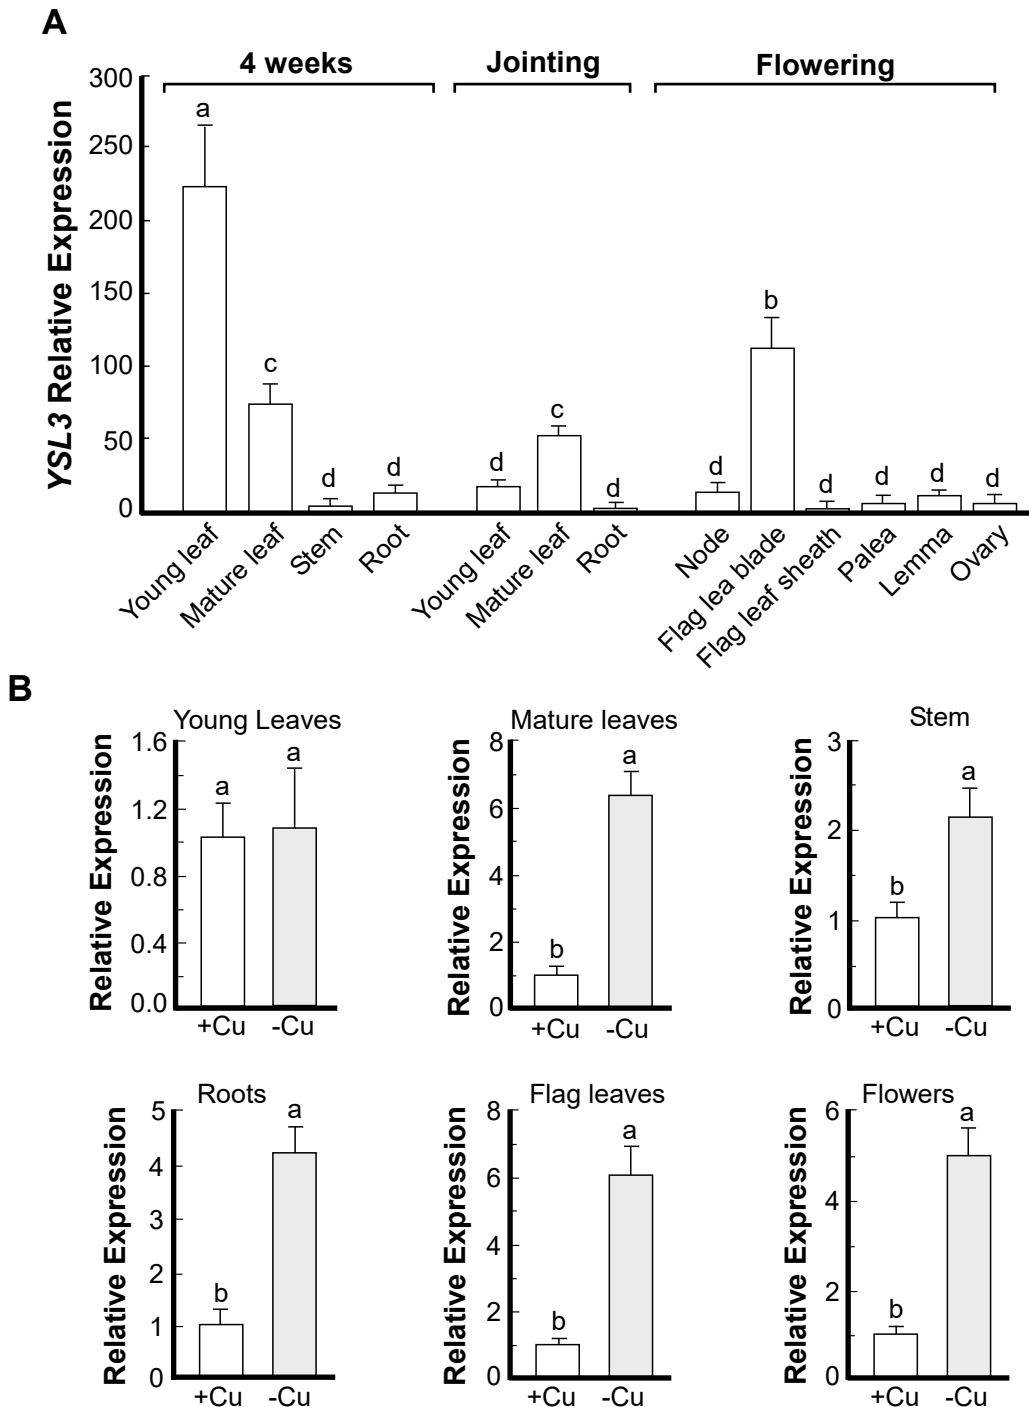

**Figure 2. Copper deficiency increases transcript abundance of YSL3.** (A) The expression level of YSL3 in different tissues at different growth stages. Wild-type *Brachypodium* was grown hydroponically under copper sufficient (250 nM CuSO<sub>4</sub>) conditions. The indicated plant tissues were collected at the indicated time and developmental stage; RNA was extracted and subjected to RT-qPCR analysis. (B) The expression level of YSL3 in different tissues of wild-type *Brachypodium* grown hydroponically under copper sufficient (+Cu) or deficient conditions (-Cu) conditions. Young (2 uppermost leaves) and mature leaves (the remaining leaves), stems and roots were collected from four-week-old plants. Flag leaves and flowers were collected from six-week-old plants. Copper deficiency was achieved by transferring plants to a fresh medium lacking copper one week prior to tissue sampling. A and B show mean values from 3 independent experiments; error bars show S.E. Tissues were pooled from 3 plants per each experiment. Levels not connected by same letter are significantly different ( $p < 0.05$ ).

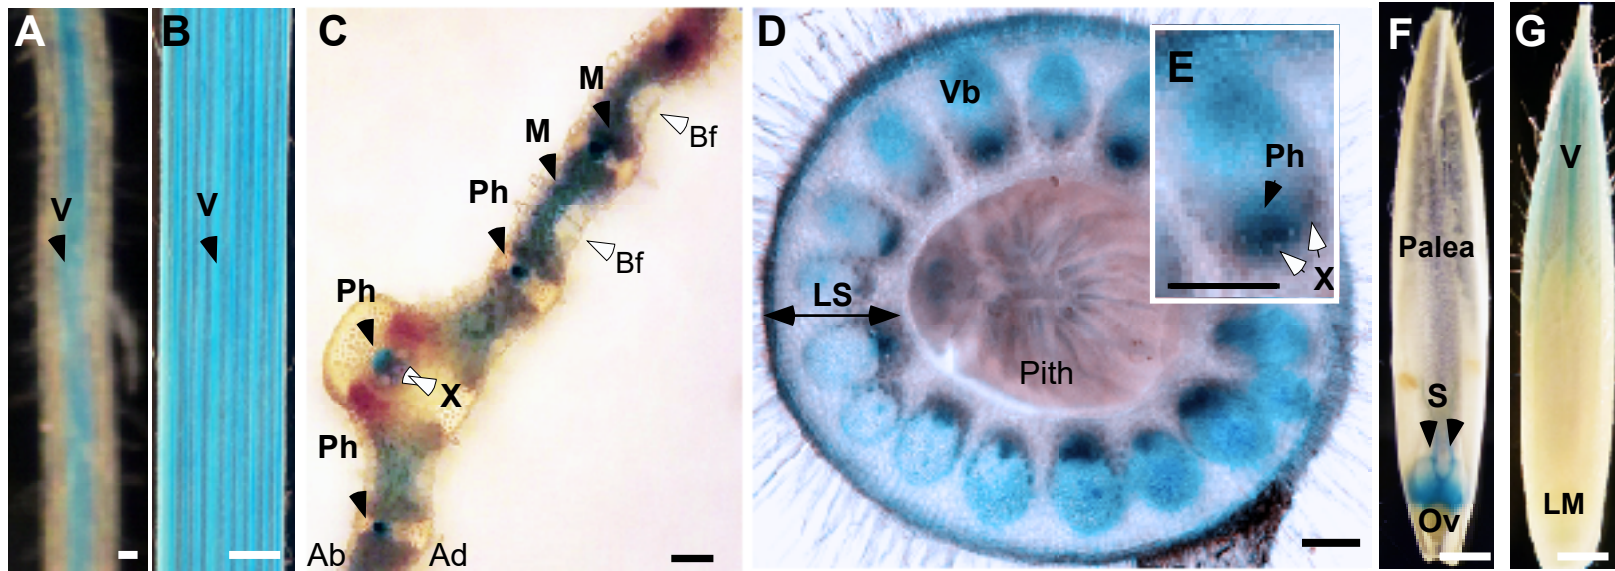

**Figure 3. Tissue-specificity of the expression of *YSL3*.** Transgenic plants expressing *YSL3pro-GUS* construct were grown hydroponically for 3 (**A** to **C**) or 6 (**D** to **G**) weeks. Plants were transferred to hydroponic solution without copper (-Cu) for 1 week prior to histochemical analysis. (**A**) and (**B**) show representative images of GUS staining in the vasculature (V, black arrow) of lateral roots and the third emerged leaf, respectively. Transverse sections through a leaf lamina (**C**), and a node (**D**) show GUS staining in tissues indicated by black arrows. (**E**) shows a close-up of a vascular bundle embedded in a dashed box in (**D**). (**F**) shows GUS staining in dissected flowers of *YSL3pro-GUS*-expressing transgenics grown under copper deficiency. (**G**) shows GUS staining in the vasculature of the lemma of plants grown under copper deficiency. X-xylem vessels; Ph-phloem, Vb - vascular bundle; LS - leaf sheath of the node, V - vasculature; S - styles of pistils; Ov - ovary; LM - lemma; Bf - bulliform cells, Ad is the adaxial, Ab is the abaxial side of the leaf lamina. *YSL3pro-GUS*-mediated staining is indicated by black arrows. Open arrows point to other tissues and cell-types. GUS staining was not detected in plants grown under copper sufficient conditions. Scale bars: 100  $\mu$ m for **A**, **C**, **D**, **E** and 1 mm for **B**, **F**, **G**.

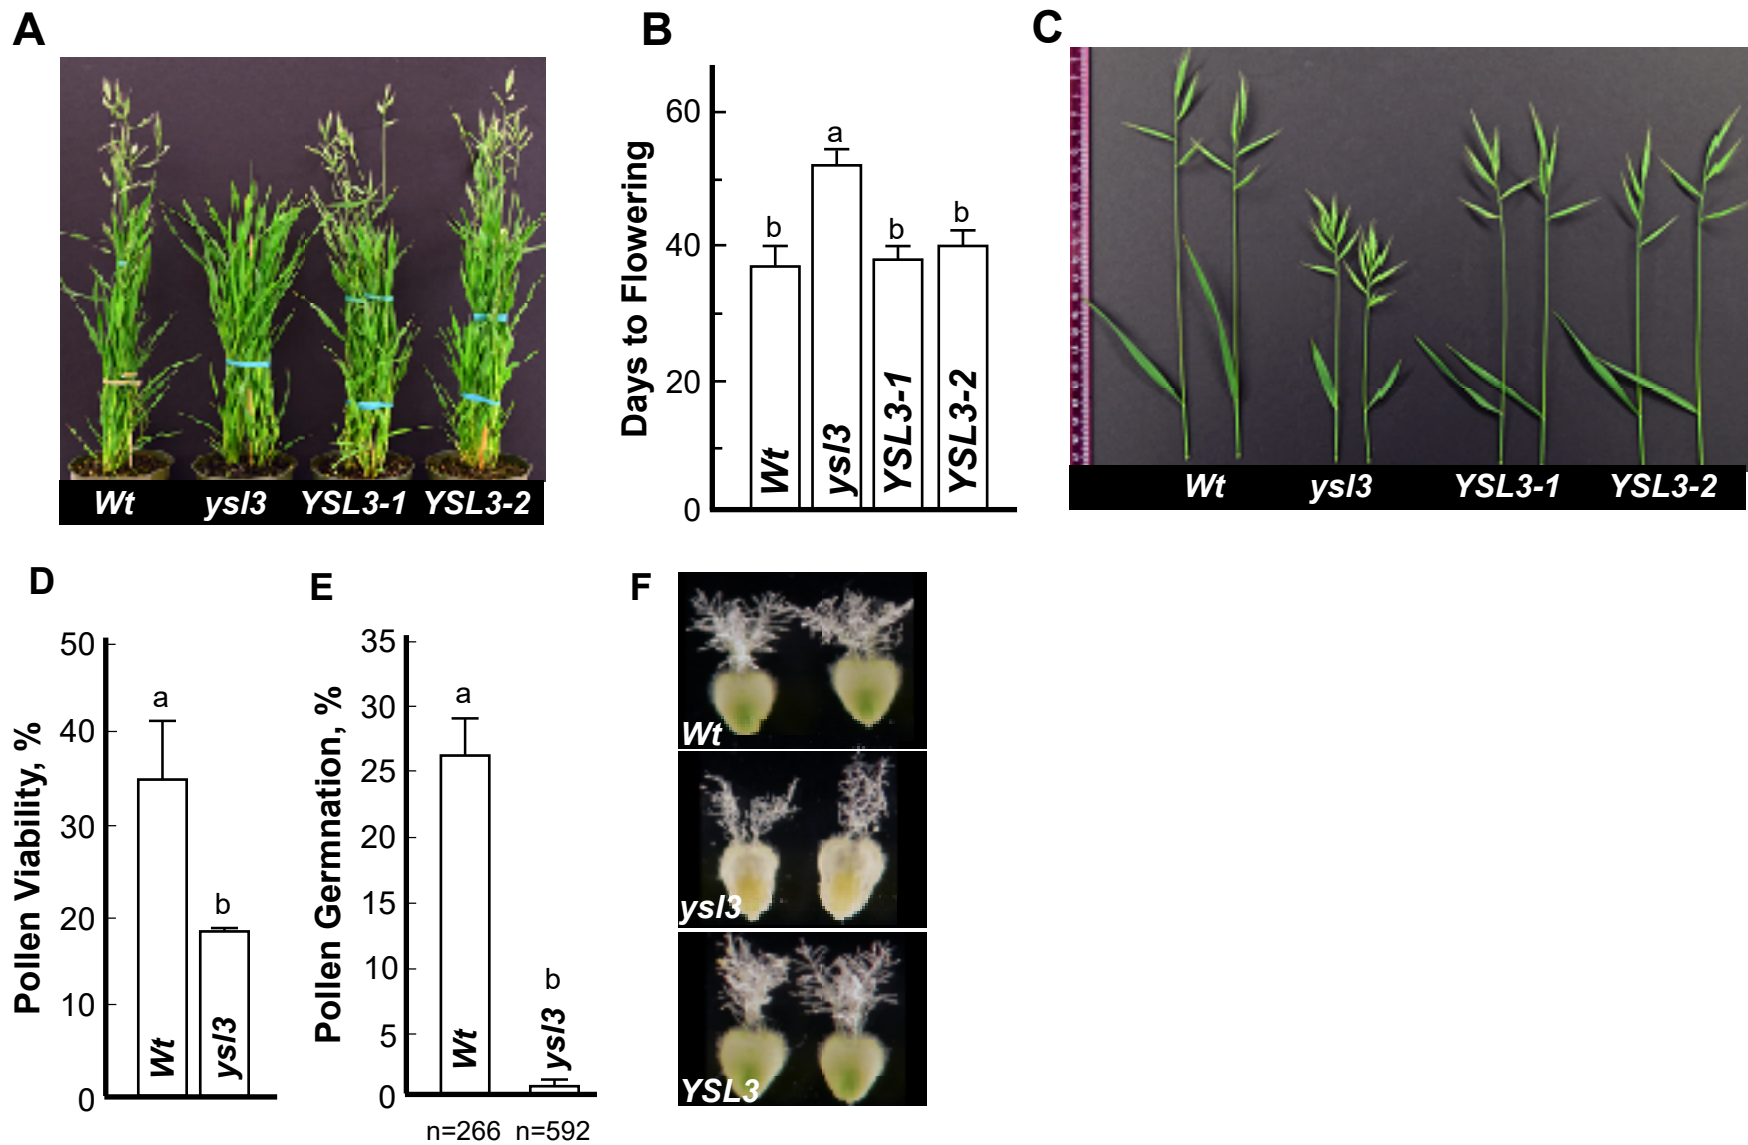

**Figure 4. The *ysl3-3* mutant has a delayed flowering time, altered inflorescence architecture and pollen viability.** The indicated plant lines were grown in soil and fertilized bi-weekly with the N-P-K fertilizer. **(A)** shows a representative image of the *ysl3-3* mutant which was still in the vegetative stage in contrast to wild-type and *YSL3-1* and *YSL3-2* complementary lines that have reached the reproductive stage of the development. **(B)** shows days to flowering in each of the indicated plant lines. Mean values  $\pm$  S.E are shown ( $n = 3$  independent experiment with at least 6 plants analyzed per each experiment). Levels not connected by same letter are significantly different ( $p < 0.05$ ). **(C)** shows a representative image of spikes with a flag leaf collected from plants grown in soil. In order to collect spikes of all plant lines simultaneously, the *ysl3-3* mutant has been germinated two weeks in advance to other plant lines. **(D)** shows the viability of pollen collected from the wild-type (*Wt*) and the *ysl3-3* mutant (*ysl3*), grown as described above. Mean values of 6 independently grown plants from three independent experiments are shown. Error bars show S.E. Levels not connected by same letter are significantly different ( $p < 0.05$ ). **(E)** *In vitro* pollen germination assay shows poor germination rate of the *ysl3-3* mutant compared to wild-type. Values are mean  $\pm$  SE of 4 and 7 independent experiments for wild-type and the *ysl3-3* mutant, respectively;  $n$  = number of pollens scored are shown below each bar. Levels not connected by same letter are significantly different ( $p < 0.01$ ). **(F)** shows the morphology of pistils collected from wild-type, the *ysl3-3* mutant, and the *YSL3-1* complementary line, all grown in soils and fertilized bi-weekly with N-P-K.

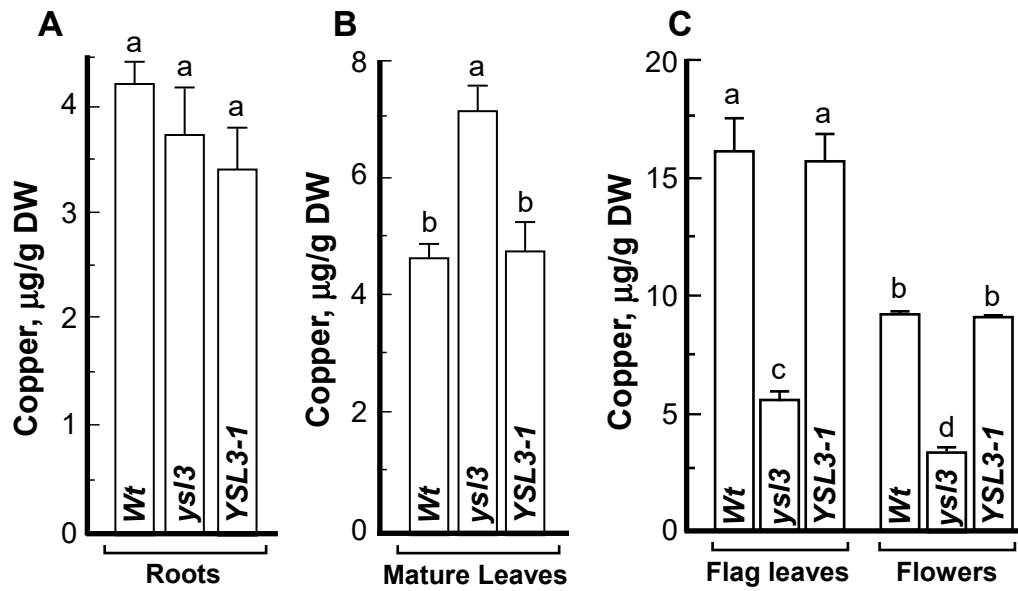

**Figure 5. Copper delivery to flag leaves and flowers is impaired in the *ys/3* mutant.** ICP-MS-based analysis of the concentration of copper in roots (**A**), mature leaves (**B**), flag leaves and flowers (**C**) of wild-type plants (Wt), the *ys/3-3* mutant (*ys/3*) and the *ys/3-3* mutant expressing the *YSL3* cDNA (*YSL3-1*). **A** to **C** show mean values from three independent experiments, error bars show S.E. Levels not connected by the same letter are significantly different ( $p < 0.05$ ).

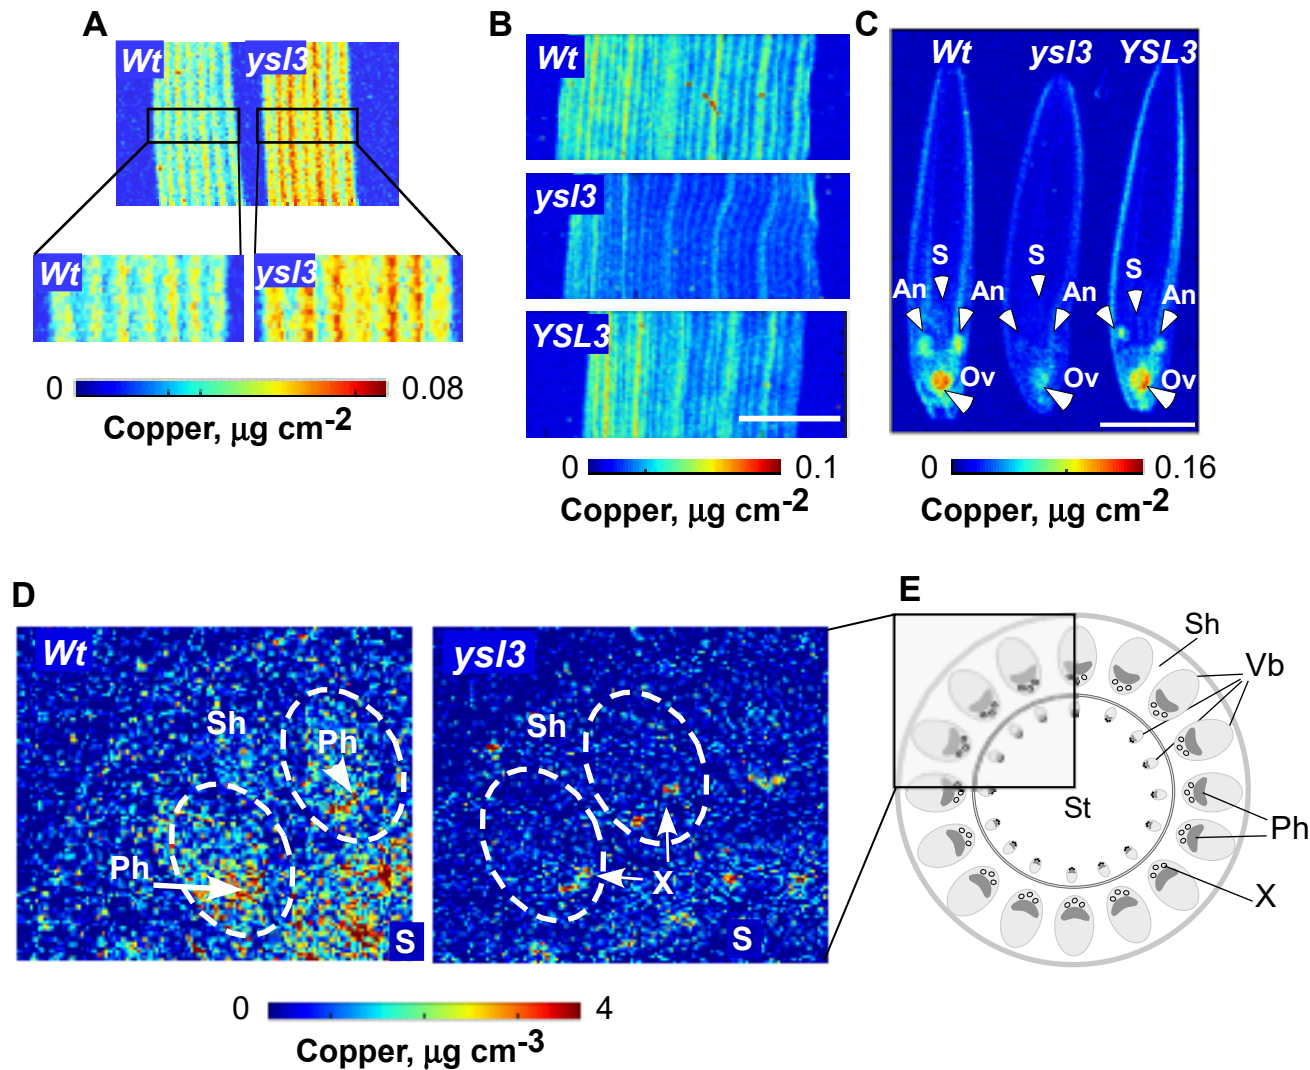

**Figure 6. The distribution of copper is altered in the *ysl3-3* mutant.** SXRf-based analysis of the spatial distribution of copper in mature leaves (A), flag leaves (B) and florets (C) of the indicated plant lines. Middle part of the leaf was used for SXRf imaging in both A and B. White arrows in C point to anthers (An), stigma (S) and ovaries (Ov). Scale bar = 2 mm. Mature leaves in (A) were collected from 3-week-old plants, grown hydroponically with 0.25  $\mu\text{M}$   $\text{CuSO}_4$ . Flag leaves and florets were collected from soil-grown plants that were fertilized bi-weekly with N-P-K. (D) Two-dimensional confocal SXRf (2D-CSXRf) was used to visualize the spatial distribution of copper in node I of indicated plant lines. (E) illustrates the anatomy of the upper part of the node I. Part of the node in a rectangle was scanned using C-SXRf and is shown in D. Sh - leaf sheath, Vb- vascular bundle, Ph - ploem, X- xylem.



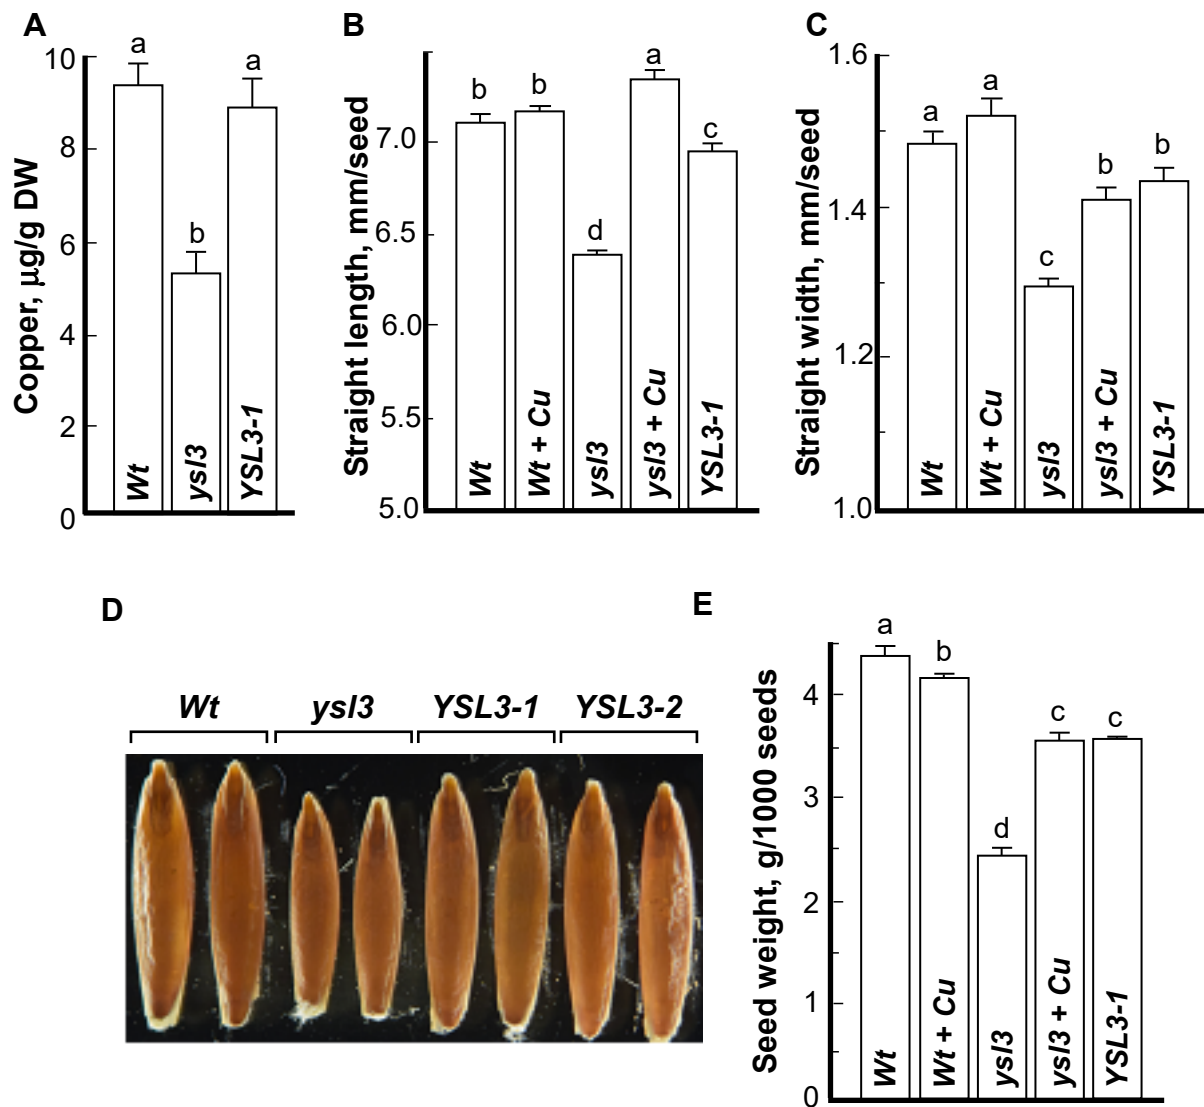

**Figure 7. Seeds of the *ysl3-3* mutant accumulate less copper, are smaller and lighter.** Grains were collected from soil-grown plants that were fertilized bi-weekly with N-P-K. **(A)** ICP-MS analysis of copper concentration in seeds of the indicated plant lines. **(B, C)** shows straight length and width, respectively of grains collected from the indicated plant lines. Grains were dehulled and the straight length and width of randomly selected grains was measured using the WinSEEDLE<sup>TM</sup> of STD4800 Scanner (Regent Instruments Inc., Canada, 2015). **(D)** shows a representative image of seeds pooled from at least three plants from each independent experiment ( $n=3$ ). **(E)** shows the weight of 1000 dehulled grains of indicated plant lines. Presented values are arithmetic means  $\pm$  S.E. ( $n = 3$  pools of seeds from five plants per each line; a representative result from 3 independent experimental set-ups is shown). Seeds were pooled together from five plants per line. Levels not connected by same letters are significantly different ( $p < 0.05$ ).

## Parsed Citations

1. Godfray, H.C.J., et al., Food Security: The Challenge of Feeding 9 Billion People. *Science*, 2010. 327(5967): p. 812-818.  
Pubmed: [Author and Title](#)  
Google Scholar: [Author Only](#) [Title Only](#) [Author and Title](#)
2. Shorrocks, V.M. and B.J. Alloway, Copper in plant, animal and human nutrition. 1988, Potters Bar, Hertfordshire: Copper Development Association. 106.  
Pubmed: [Author and Title](#)  
Google Scholar: [Author Only](#) [Title Only](#) [Author and Title](#)
3. Mitra, G.N., Regulation of Nutrient Uptake by Plants. A Biochemical and Molecular Approach. 2015, New Delhi, India: Springer India. 195.  
Pubmed: [Author and Title](#)  
Google Scholar: [Author Only](#) [Title Only](#) [Author and Title](#)
4. White, P.J. and M.R. Broadley, Biofortification of crops with seven mineral elements often lacking in human diets - iron, zinc, copper, calcium, magnesium, selenium and iodine. *New Phytologist*, 2009. 182(1): p. 49-84.
5. Solberg, E., I. Evans, and D. Penny, Copper deficiency: Diagnosis and correction. *Agri-facts. Soil Fertility/Crop Nutrition. Alberta Agriculture, Food and Rural Development, Agdex 532-3*, pp. 1-9. 1999.  
Pubmed: [Author and Title](#)  
Google Scholar: [Author Only](#) [Title Only](#) [Author and Title](#)
6. Yan, J., et al., Arabidopsis Pollen Fertility Requires the Transcription Factors CITF1 and SPL7 That Regulate Copper Delivery to Anthers and Jasmonic Acid Synthesis. *The Plant Cell*, 2017. 29(12): p. 3012-3029.  
Pubmed: [Author and Title](#)  
Google Scholar: [Author Only](#) [Title Only](#) [Author and Title](#)
7. Burkhead, J.L., et al., Copper homeostasis. *New Phytologist*, 2009. 182(4): p. 799-816.
8. Schroeder, J.I., et al., Using membrane transporters to improve crops for sustainable food production. *Nature*, 2013. 497(7447): p. 60-66.  
Pubmed: [Author and Title](#)  
Google Scholar: [Author Only](#) [Title Only](#) [Author and Title](#)
9. Tshikunde, N.M., et al., Agronomic and Physiological Traits, and Associated Quantitative Trait Loci (QTL) Affecting Yield Response in Wheat (*Triticum aestivum* L.): A Review. *Frontiers in plant science*, 2019. 10: p. 1428-1428.  
Pubmed: [Author and Title](#)  
Google Scholar: [Author Only](#) [Title Only](#) [Author and Title](#)
10. Sancenon, V., et al., Identification of a copper transporter family in *Arabidopsis thaliana*. *Plant Mol Biol*, 2003. 51(4): p. 577-87.
11. Kampfenkel, K., et al., Molecular Characterization of a Putative *Arabidopsis thaliana* Copper Transporter and Its Yeast Homologue. *Journal of Biological Chemistry*, 1995. 270(47): p. 28479-28486.  
Pubmed: [Author and Title](#)  
Google Scholar: [Author Only](#) [Title Only](#) [Author and Title](#)
12. Jung, H.I., et al., COPT6 is a plasma membrane transporter that functions in copper homeostasis in *Arabidopsis* and is a novel target of SQUAMOSA promoter-binding protein-like 7. *J Biol Chem*, 2012. 287(40): p. 33252-67.
13. Gayomba, S.R., et al., The CTR/COPT-dependent copper uptake and SPL7-dependent copper deficiency responses are required for basal cadmium tolerance in *A. thaliana*. *Metallomics*, 2013. 5(9): p. 1262-75.
14. DiDonato, R.J., et al., Arabidopsis Yellow Stripe-Like2 (YSL2): a metal-regulated gene encoding a plasma membrane transporter of nicotianamine-metal complexes. *The Plant Journal*, 2004. 39(3): p. 403-414.  
Pubmed: [Author and Title](#)  
Google Scholar: [Author Only](#) [Title Only](#) [Author and Title](#)
15. Waters, B., et al., Mutations in Arabidopsis yellow stripe-like 1 and yellow stripe-like 3 reveal their roles in metal ion homeostasis and loading of metal ions in seeds. *Plant Physiol*, 2006. 141: p. 1446 - 1458.  
Pubmed: [Author and Title](#)  
Google Scholar: [Author Only](#) [Title Only](#) [Author and Title](#)
16. Chu, H.H., et al., Successful reproduction requires the function of Arabidopsis Yellow Stripe-Like1 and Yellow Stripe-Like3 metal-nicotianamine transporters in both vegetative and reproductive structures. *Plant Physiol*, 2010. 154(1): p. 197-210.
17. Abdel-Ghany, S.E., et al., Two P-Type ATPases Are Required for Copper Delivery in *Arabidopsis thaliana* Chloroplasts. *The Plant Cell*, 2005. 17(4): p. 1233-1251.  
Pubmed: [Author and Title](#)  
Google Scholar: [Author Only](#) [Title Only](#) [Author and Title](#)
18. Bernal, M., et al., Transcriptome Sequencing Identifies SPL7-Regulated Copper Acquisition Genes FRO4/FRO5 and the Copper Dependence of Iron Homeostasis in *Arabidopsis*. *The Plant Cell Online*, 2012. 24(2): p. 738-761.

19. Yamasaki, H., et al., SQUAMOSA Promoter Binding Protein-Like7 Is a Central Regulator for Copper Homeostasis in Arabidopsis. *The Plant Cell*, 2009. 21(1): p. 347-361.  
Pubmed: [Author and Title](#)  
Google Scholar: [Author Only](#) [Title Only](#) [Author and Title](#)
20. Jung, H.-i., et al., *Brachypodium distachyon* as a model system for studies of copper transport in cereal crops. *Frontiers in Plant Science*, 2014. 5.
21. Yuan, M., et al., Molecular and functional analyses of COPT/Ctr-type copper transporter-like gene family in rice. *BMC Plant Biology*, 2011. 11(1): p. 69.  
Pubmed: [Author and Title](#)  
Google Scholar: [Author Only](#) [Title Only](#) [Author and Title](#)
22. Zheng, L., et al., YSL16 Is a Phloem-Localized Transporter of the Copper-Nicotianamine Complex That Is Responsible for Copper Distribution in Rice. *The Plant Cell*, 2012. 24(9): p. 3767-3782.  
Pubmed: [Author and Title](#)  
Google Scholar: [Author Only](#) [Title Only](#) [Author and Title](#)
23. Zhang, C., et al., OsYSL16 is Required for Preferential Cu Distribution to Floral Organs in Rice. *Plant and Cell Physiology*, 2018. 59(10): p. 2039-2051.  
Pubmed: [Author and Title](#)  
Google Scholar: [Author Only](#) [Title Only](#) [Author and Title](#)
24. Schwacke, R., et al., ARAMEMNON, a Novel Database for Arabidopsis Integral Membrane Proteins. *Plant Physiology*, 2003. 131(1): p. 16-26.
25. Kakei, Y., et al., OsYSL16 plays a role in the allocation of iron. *Plant molecular biology*, 2012. 79(6): p. 583-594.
26. Lee, S., et al., Activation of rice Yellow Stripe1-Like 16 (OsYSL16) enhances iron efficiency. *Molecules and cells*, 2012. 33(2): p. 117-126.
27. Jung, H.-I., et al., *Brachypodium distachyon* as a model system for studies of copper transport in cereal crops. *Frontiers in plant science*, 2014. 5: p. 236-236.
28. Yordem, B.K., et al., *Brachypodium distachyon* as a new model system for understanding iron homeostasis in grasses: phylogenetic and expression analysis of Yellow Stripe-Like (YSL) transporters. *Annals of Botany*, 2011. 108(5): p. 821-833.
29. Derbyshire, P. and M.E. Byrne, MORE SPIKELETS1 Is Required for Spikelet Fate in the Inflorescence of *Brachypodium*. *Plant Physiology*, 2013. 161(3): p. 1291-1302.  
Pubmed: [Author and Title](#)  
Google Scholar: [Author Only](#) [Title Only](#) [Author and Title](#)
30. Scholthof, K.-B.G., et al., *Brachypodium*: A Monocot Grass Model Genus for Plant Biology. *The Plant cell*, 2018. 30(8): p. 1673-1694.  
Pubmed: [Author and Title](#)  
Google Scholar: [Author Only](#) [Title Only](#) [Author and Title](#)
31. Yamaji, N. and J.F. Ma, The node, a hub for mineral nutrient distribution in graminaceous plants. *Trends in Plant Science*, 2014. 19(9): p. 556-563.
32. Agyeman-Budu, D.N., et al., Germanium Collimating micro-Channel Arrays For High Resolution, High Energy Confocal X-ray Fluorescence Microscopy. *Icxom23: International Conference on X-Ray Optics and Microanalysis*, 2016. 1764.  
Pubmed: [Author and Title](#)  
Google Scholar: [Author Only](#) [Title Only](#) [Author and Title](#)
33. Mantouvalou, I., W. Malzer, and B. Kanngiesser, Quantification for 3D micro X-ray fluorescence. *Spectrochimica Acta Part B-Atomic Spectroscopy*, 2012. 77: p. 9-18.
34. Bailey-Serres, J., et al., Genetic strategies for improving crop yields. *Nature*, 2019. 575(7781): p. 109-118.  
Pubmed: [Author and Title](#)  
Google Scholar: [Author Only](#) [Title Only](#) [Author and Title](#)
35. Ingram, J.S.I. and J.R. Porter, Plant science and the food security agenda. *Nature Plants*, 2015. 1(11): p. 15173.  
Pubmed: [Author and Title](#)  
Google Scholar: [Author Only](#) [Title Only](#) [Author and Title](#)
36. White, P.J., Chapter 3 - Long-distance Transport in the Xylem and Phloem A2 - Marschner, Petra, in *Marschner's Mineral Nutrition of Higher Plants (Third Edition)*. 2012, Academic Press: San Diego. p. 49-70.  
Pubmed: [Author and Title](#)  
Google Scholar: [Author Only](#) [Title Only](#) [Author and Title](#)
37. Denis, M., Structure and function of cytochrome-c oxidase. *Biochimie*, 1986. 68(3): p. 459-470.
38. Radin, I., et al., The Arabidopsis COX11 Homolog is Essential for Cytochrome c Oxidase Activity. *Frontiers in plant science*, 2015. 6: p. 1091-1091.

Pubmed: [Author and Title](#)

Google Scholar: [Author Only Title Only Author and Title](#)

39. Tvrdá, E., et al., Iron and copper in male reproduction: a double-edged sword. *Journal of assisted reproduction and genetics*, 2015. 32(1): p. 3-16.
40. Edlund, A.F., R. Swanson, and D. Preuss, Pollen and Stigma Structure and Function: The Role of Diversity in Pollination. *The Plant Cell*, 2004. 16(suppl 1): p. S84-S97.  
Pubmed: [Author and Title](#)  
Google Scholar: [Author Only Title Only Author and Title](#)
41. Pautler, M., et al., Grass Meristems I: Shoot Apical Meristem Maintenance, Axillary Meristem Determinacy and the Floral Transition. *Plant and Cell Physiology*, 2013. 54(3): p. 302-312.
42. Tanaka, W., et al., Grass Meristems II: Inflorescence Architecture, Flower Development and Meristem Fate. *Plant and Cell Physiology*, 2013. 54(3): p. 313-324.
43. Landrein, B., et al., Nitrate modulates stem cell dynamics in *Arabidopsis* shoot meristems through cytokinins. *Proceedings of the National Academy of Sciences*, 2018. 115(6): p. 1382-1387.  
Pubmed: [Author and Title](#)  
Google Scholar: [Author Only Title Only Author and Title](#)
44. Barazesh, S. and P. McSteen, Hormonal control of grass inflorescence development. *Trends in Plant Science*, 2008. 13(12): p. 656-662.
45. Satoh-Nagasawa, N., et al., A trehalose metabolic enzyme controls inflorescence architecture in maize. *Nature*, 2006. 441(7090): p. 227-230.  
Pubmed: [Author and Title](#)  
Google Scholar: [Author Only Title Only Author and Title](#)
46. Claeys, H., et al., Control of meristem determinacy by trehalose 6-phosphate phosphatases is uncoupled from enzymatic activity. *Nature Plants*, 2019. 5(4): p. 352-357.
47. Vollbrecht, E., et al., Architecture of floral branch systems in maize and related grasses. *Nature*, 2005. 436(7054): p. 1119-1126.  
Pubmed: [Author and Title](#)  
Google Scholar: [Author Only Title Only Author and Title](#)
48. Bortiri, E., et al., ramosa2 Encodes a LATERAL ORGAN BOUNDARY Domain Protein That Determines the Fate of Stem Cells in Branch Meristems of Maize. *The Plant Cell*, 2006. 18(3): p. 574-585.
49. Holt, A.L., et al., Signaling in shoot and flower meristems of *Arabidopsis thaliana*. *Current Opinion in Plant Biology*, 2014. 17: p. 96-102.
50. D'Ario, M., S. Griffiths-Jones, and M. Kim, Small RNAs: Big Impact on Plant Development. *Trends in Plant Science*, 2017. 22(12): p. 1056-1068.  
Pubmed: [Author and Title](#)  
Google Scholar: [Author Only Title Only Author and Title](#)
51. Peñarrubia, L., et al., Temporal aspects of copper homeostasis and its crosstalk with hormones. *Frontiers in plant science*, 2015. 6: p. 255-255.
52. Pilon, M., The copper microRNAs. *New Phytologist*, 2017. 213(3): p. 1030-1035.  
Pubmed: [Author and Title](#)  
Google Scholar: [Author Only Title Only Author and Title](#)
53. Derbyshire, P. and M. Byrne, MORE SPIKELETS1 is required for spikelet fate in the inflorescence of *Brachypodium distachyon*. *Plant physiology*, 2013. 161.
54. Bonnett, O.T., The development of the wheat spike. *Journal of Agricultural Research*, 1936. 53: p. 0445-0451.  
Pubmed: [Author and Title](#)  
Google Scholar: [Author Only Title Only Author and Title](#)
55. Kellogg, E.A., Floral displays: genetic control of grass inflorescences. *Current Opinion in Plant Biology*, 2007. 10(1): p. 26-31.
56. Distelfeld, A, R. Avni, and A.M. Fischer, Senescence, nutrient remobilization, and yield in wheat and barley. *Journal of Experimental Botany*, 2014. 65(14): p. 3783-3798.  
Pubmed: [Author and Title](#)  
Google Scholar: [Author Only Title Only Author and Title](#)
57. Li, N., et al., Control of grain size in rice. *Plant Reproduction*, 2018. 31(3): p. 237-251.
58. Brinton, J. and C. Uauy, A reductionist approach to dissecting grain weight and yield in wheat. *Journal of Integrative Plant Biology*, 2019. 61(3): p. 337-358.
59. Li, R., et al., The extent of parental genotypic divergence determines maximal heterosis by increasing fertility in inter-subspecific

hybrids of rice (*Oryza sativa* L.). *Molecular Breeding*, 1998. 4(3): p. 205-214.

60. Zhang, B., et al., Genetic analysis of flag leaf size and candidate genes determination of a major QTL for flag leaf width in rice. *Rice*, 2015. 8(1): p. 2.

Pubmed: [Author and Title](#)

Google Scholar: [Author Only](#) [Title Only](#) [Author and Title](#)

61. Vogel, J. and T. Hill, High-efficiency *Agrobacterium*-mediated transformation of *Brachypodium distachyon* inbred line Bd21-3. *Plant Cell Reports*, 2008. 27(3): p. 471-478.

62. The International Brachypodium, I., et al., Genome sequencing and analysis of the model grass *Brachypodium distachyon*. *Nature*, 2010. 463: p. 763.

Pubmed: [Author and Title](#)

Google Scholar: [Author Only](#) [Title Only](#) [Author and Title](#)

63. Gehl, C., et al., New GATEWAY vectors for high throughput analyses of protein-protein interactions by bimolecular fluorescence complementation. *Mol Plant*, 2009. 2(5): p. 1051-8.

64. Jung, H.-i., et al., COPT6 Is a Plasma Membrane Transporter That Functions in Copper Homeostasis in *Arabidopsis* and Is a Novel Target of SQUAMOSA Promoter-binding Protein-like 7. *Journal of Biological Chemistry*, 2012. 287(40): p. 33252-33267.

Pubmed: [Author and Title](#)

Google Scholar: [Author Only](#) [Title Only](#) [Author and Title](#)

65. Curtis, M.D. and U. Grossniklaus, A Gateway Cloning Vector Set for High-Throughput Functional Analysis of Genes in *Planta*. *Plant Physiology*, 2003. 133(2): p. 462-469.

66. Liu, L. and X.-D. Fan, CRISPR-Cas system: a powerful tool for genome engineering. *Plant Molecular Biology*, 2014. 85(3): p. 209-218.

Pubmed: [Author and Title](#)

Google Scholar: [Author Only](#) [Title Only](#) [Author and Title](#)

67. Brooks, C., et al., Efficient Gene Editing in Tomato in the First Generation Using the Clustered Regularly Interspaced Short Palindromic Repeats/CRISPR-Associated9 System. *Plant Physiology*, 2014. 166(3): p. 1292-1297.

Pubmed: [Author and Title](#)

Google Scholar: [Author Only](#) [Title Only](#) [Author and Title](#)

68. Čermák, T., et al., A Multipurpose Toolkit to Enable Advanced Genome Engineering in Plants. *The Plant Cell*, 2017. 29(6): p. 1196-1217.

Pubmed: [Author and Title](#)

Google Scholar: [Author Only](#) [Title Only](#) [Author and Title](#)

69. Lei, Y., et al., CRISPR-P: A Web Tool for Synthetic Single-Guide RNA Design of CRISPR-System in Plants. *Molecular Plant*, 2014. 7(9): p. 1494-1496.

Pubmed: [Author and Title](#)

Google Scholar: [Author Only](#) [Title Only](#) [Author and Title](#)

70. Weber, E., et al., Assembly of Designer TAL Effectors by Golden Gate Cloning. *PLOS ONE*, 2011. 6(5): p. e19722.

Pubmed: [Author and Title](#)

Google Scholar: [Author Only](#) [Title Only](#) [Author and Title](#)

71. Porebski, S., L.G. Bailey, and B.R. Baum, Modification of a CTAB DNA extraction protocol for plants containing high polysaccharide and polyphenol components. *Plant molecular biology reporter*, 1997. 15(1): p. 8-15.

72. Inoue, H., et al., Three rice nicotianamine synthase genes, OsNAS1, OsNAS2, and OsNAS3 are expressed in cells involved in long-distance transport of iron and differentially regulated by iron. *The Plant Journal*, 2003. 36(3): p. 366-381.

73. Zhai, Z., T. Sooksa-nguan, and O.K. Vatamaniuk, Establishing RNA interference as a reverse-genetic approach for gene functional analysis in protoplasts. *Plant Physiol*, 2009. 149(2): p. 642-52.

74. Perea-García, A., et al., Modulation of copper deficiency responses by diurnal and circadian rhythms in *Arabidopsis thaliana*. *Journal of Experimental Botany*, 2016. 67(1): p. 391-403.

75. Yan, J., et al., *Arabidopsis* Pollen Fertility Requires the Transcription Factors CITF1 and SPL7 That Regulate Copper Delivery to Anthers and Jasmonic Acid Synthesis. *The Plant cell*, 2017. 29(12): p. 3012-3029.

Pubmed: [Author and Title](#)

Google Scholar: [Author Only](#) [Title Only](#) [Author and Title](#)

76. Zhai, Z., et al., OPT3 Is a Phloem-Specific Iron Transporter That Is Essential for Systemic Iron Signaling and Redistribution of Iron and Cadmium in *Arabidopsis*. *The Plant Cell*, 2014. 26(5): p. 2249-2264.

Pubmed: [Author and Title](#)

Google Scholar: [Author Only](#) [Title Only](#) [Author and Title](#)

77. Mandaokar, A. and J. Browse, MYB108 acts together with MYB24 to regulate jasmonate-mediated stamen maturation in *Arabidopsis*. *Plant Physiol*, 2009. 149(2): p. 851-62.

78. Heslop-Harrison, J. and Y. Heslop-Harrison, Evaluation of pollen viability by enzymatically induced fluorescence; intracellular

hydrolysis of fluorescein diacetate. *Stain Technol*, 1970. 45(3): p. 115-20.

79. Regan, S.M. and B.A. Moffatt, *Cytochemical Analysis of Pollen Development in Wild-Type Arabidopsis and a Male-Sterile Mutant*. *Plant Cell*, 1990. 2(9): p. 877-889.
